# Supplementary material for: Meta-analysis of binary outcomes via generalized linear mixed models: a simulation study
Source: PubMed Central journal article supplement (PMC6032567; doi:10.1186/s12874-018-0531-9), 2018-07-04

## Additional file 2 - Simulation results for $p_{i2} = 0.1$ , $p_{i2} = 0.2$ and $p_{i2} = 0.4$ under default settings

Figures [A4-A6](#) show the results for bias of estimation of between-study variance  $\tau^2$ , bias of estimates of overall effect measure  $\hat{\theta}$  and estimated coverage of overall effect measure  $\hat{\theta}$  in the random-effects model when  $p_{i2} = 0.1$ ,  $\theta = 1$ . Similarly, Figures [A7-A12](#) and Figures [A13-A18](#) show the results of simulations for  $p_{i2} = 0.2$  and  $p_{i2} = 0.4$  with  $\theta = 0$ ,  $\theta = 1$  respectively.

Some of the Figures; Figure [A4](#), Figure [A8](#), Figure [A13](#), Figure [A14](#), show the erratic behaviour in performance of a conditional GLMM with an exact likelihood (NCHGN) when  $N = 250$  and  $N = 1000$ . The erratic behaviour appears mostly when the true value of log-odds ratio  $\theta$  changes its value from 0 to 1 for  $p_{1i} = 0.1, 0.2, 0.4$  apart from the case in Figure [A13](#) when  $\theta = 0$ . The reason for erratic behaviour is the appearance of huge estimates of  $\tau^2$  in some of the repetitions across 10000 iterations. Please see Section [3.2](#) on page [12](#) of main text for an example of data simulated from standard REM and corresponding Figure [4](#).

We also do not exclude the possibility that the huge estimate of  $\tau^2$  may be due to nonstability of implementations in obtaining the probability mass function of the noncentral hypergeometric distribution by specifications `dFNCHypergeo` and `dnoncenhypergeom` when fitting the model in R programming language.

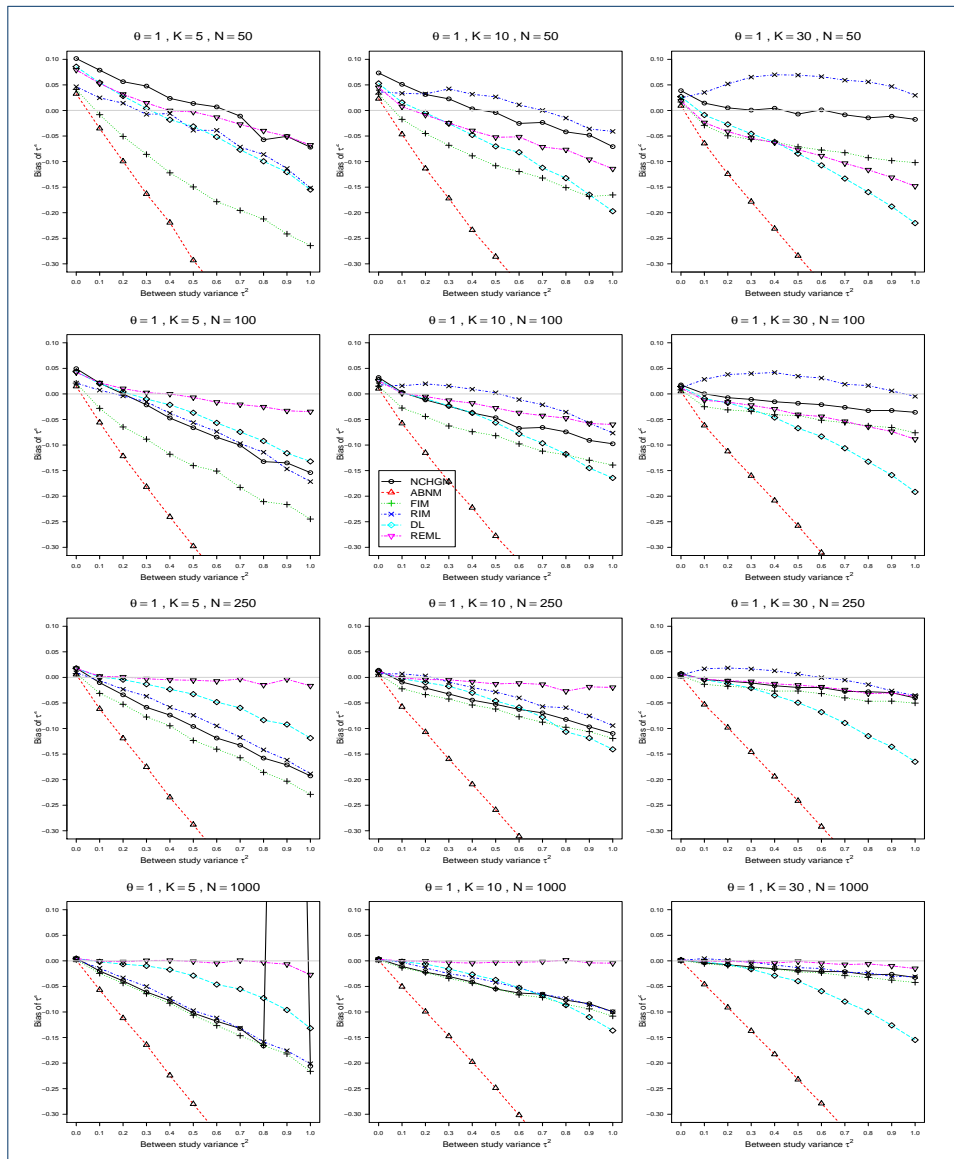

Figure A4: Bias of  $\tau^2$  in the REM when  $p_{i2} = 0.1$ ,  $\theta = 1$ ,  $0 \leq \tau^2 \leq 1$  and  $n = 50, 100, 250, 1000$ . Estimation methods are: pluses - unconditional generalized linear mixed-effects model with fixed study effects (FIM), crosses - unconditional generalized linear mixed-effects model with random study effects (RIM), circles - a conditional generalized linear mixed-effects model with exact likelihood (NCHGN), triangles - a conditional generalized linear mixed-effects model with approximate likelihood (ABNM), rhombs - DerSimonian and Laird method (DL) and reverse triangles - restricted maximum likelihood method (REML). Light grey line at 0.

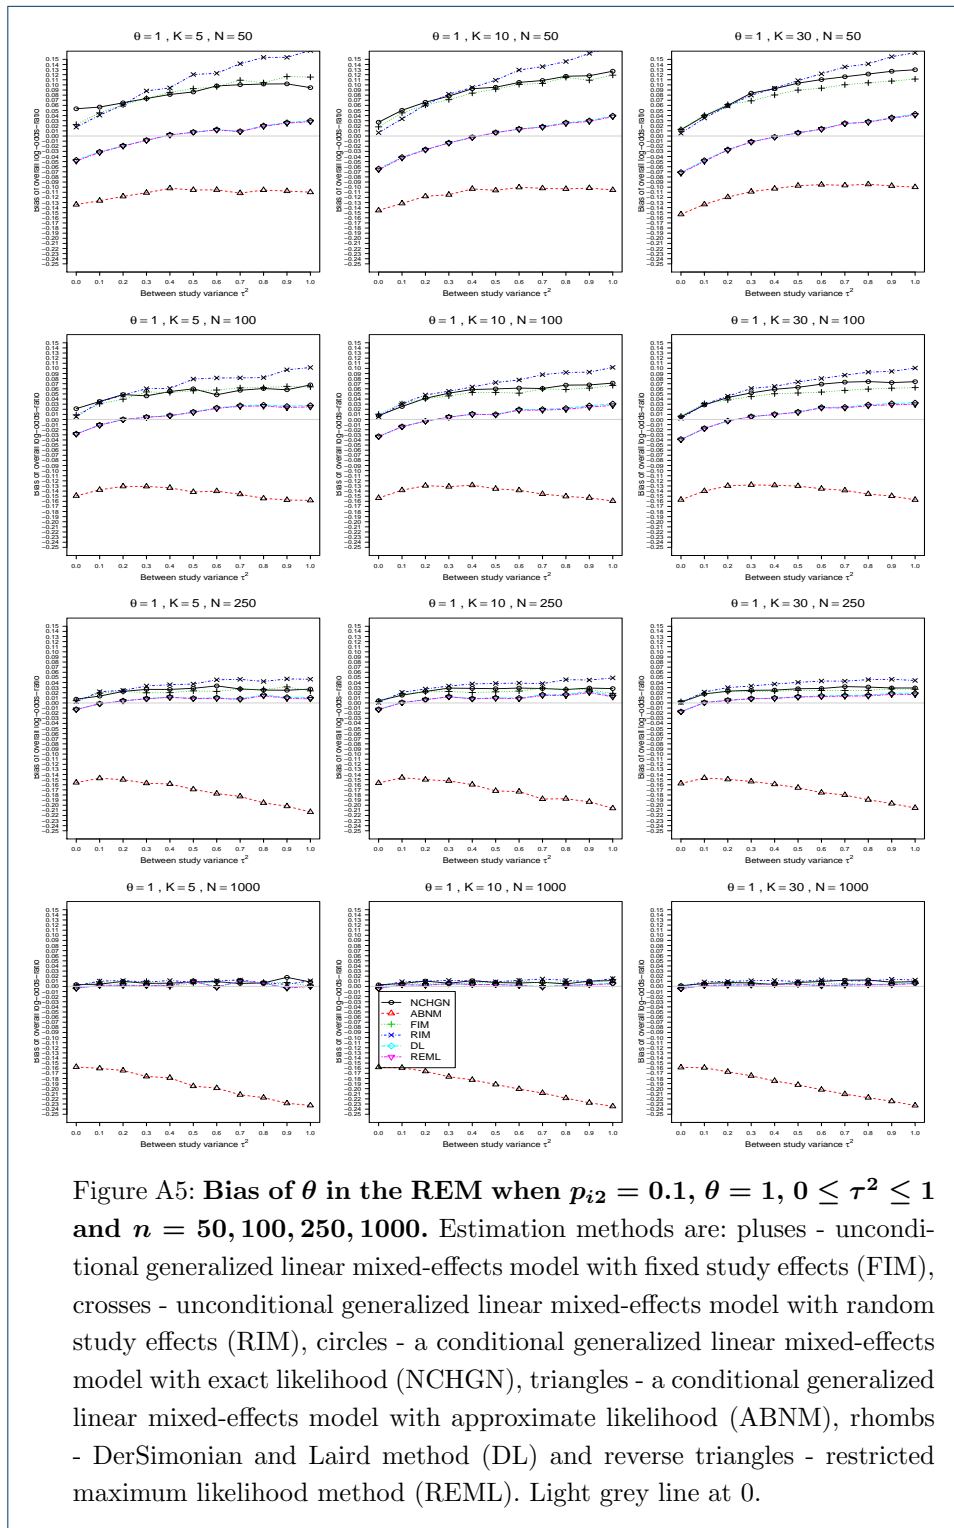

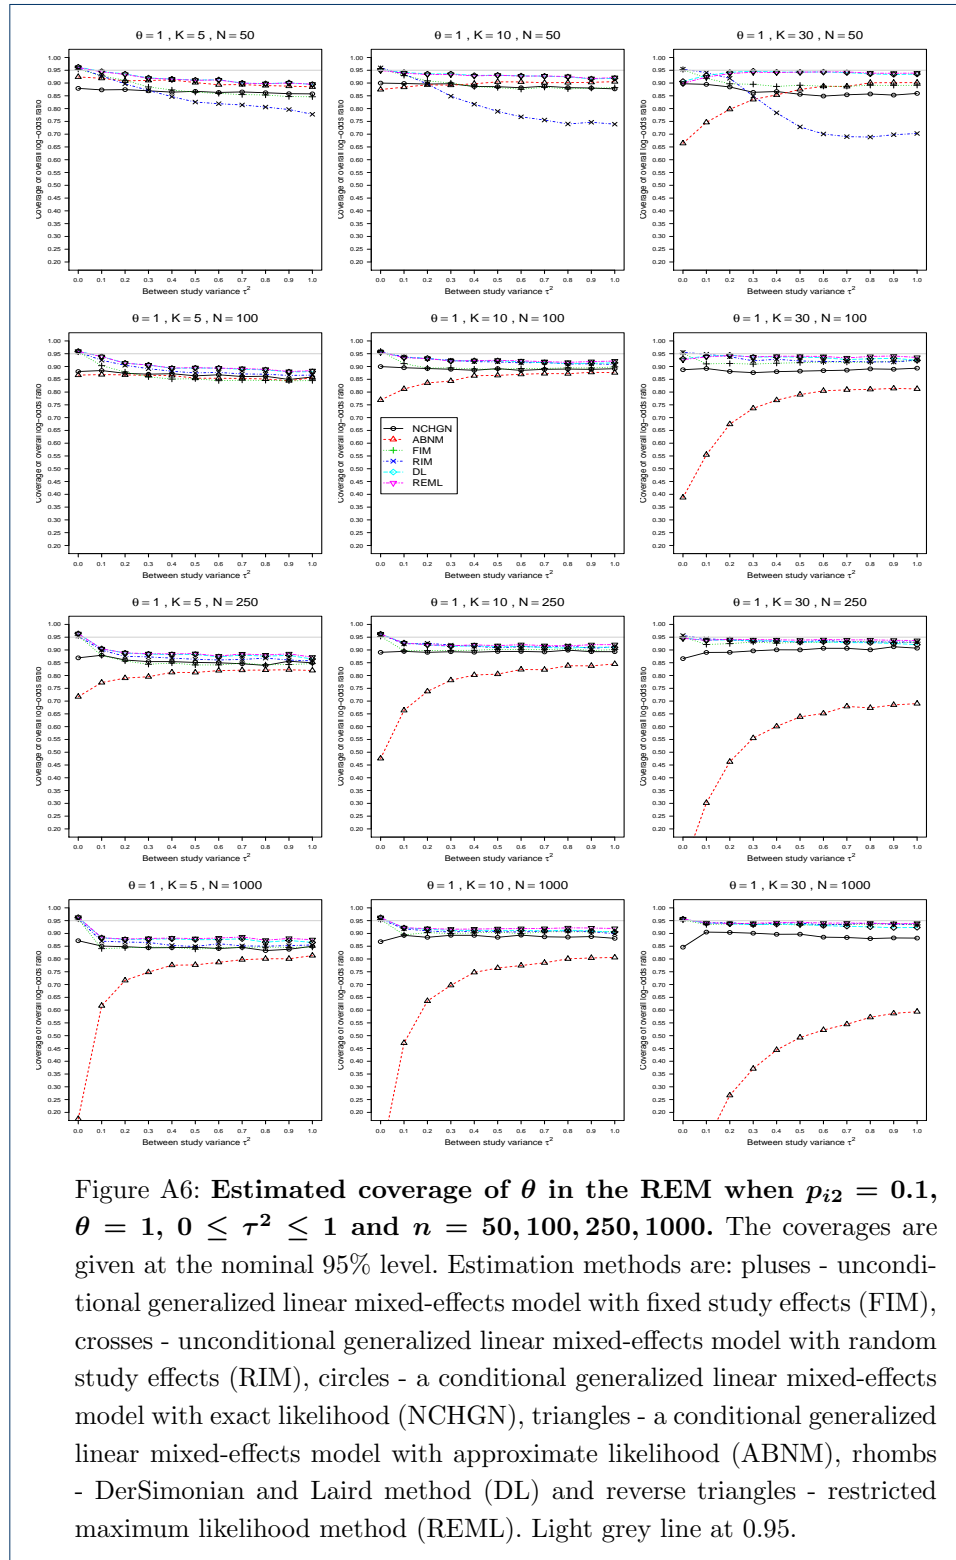

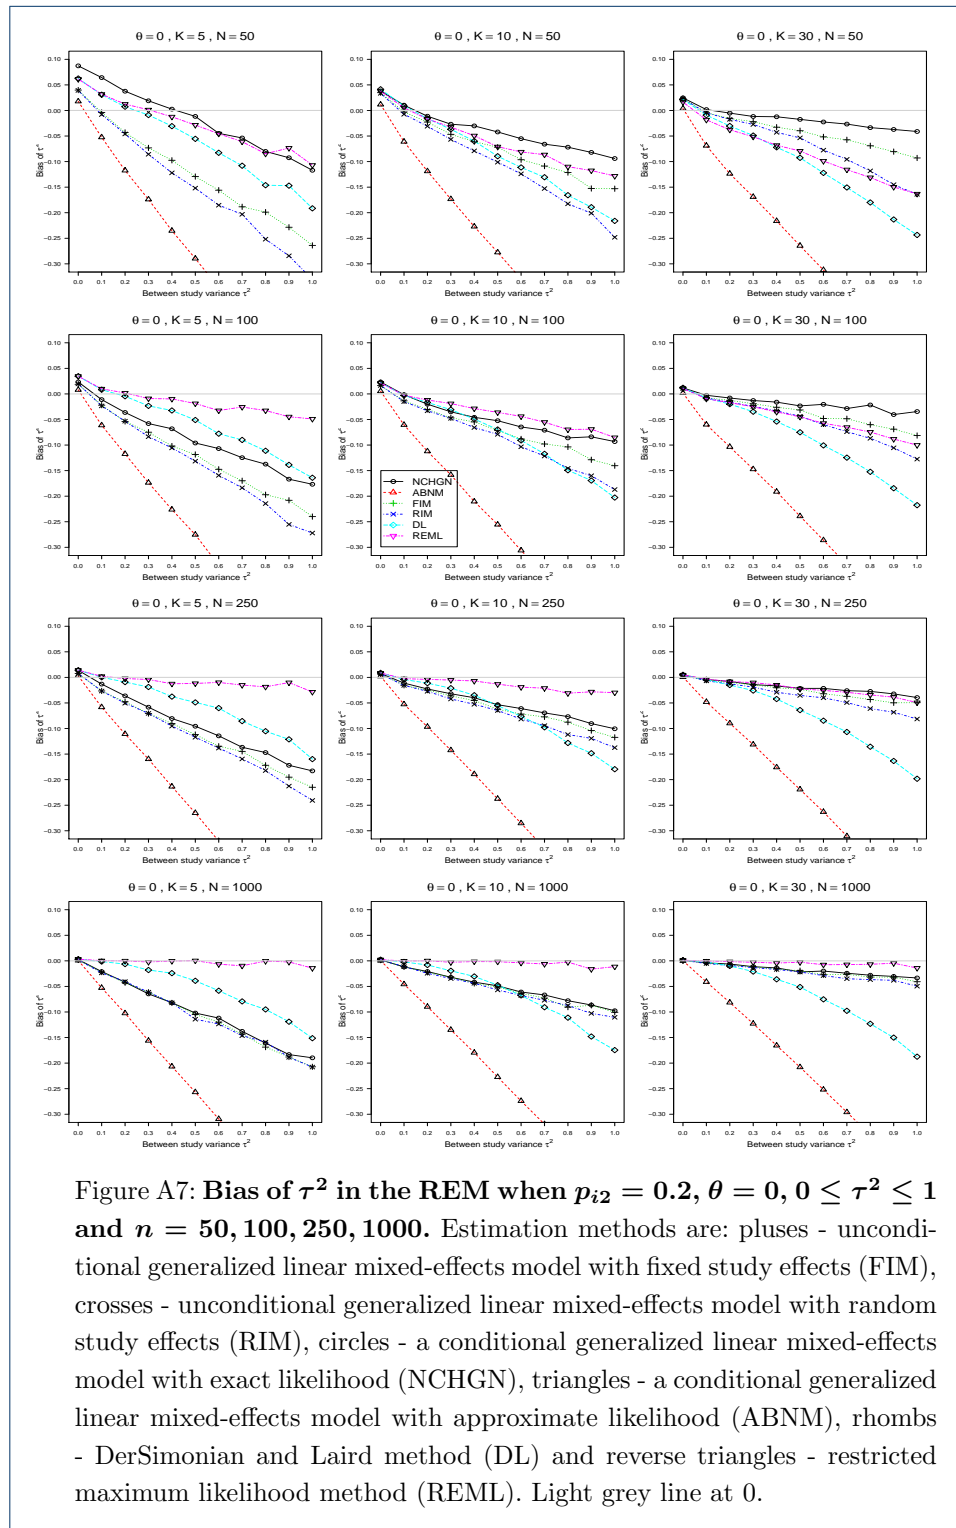

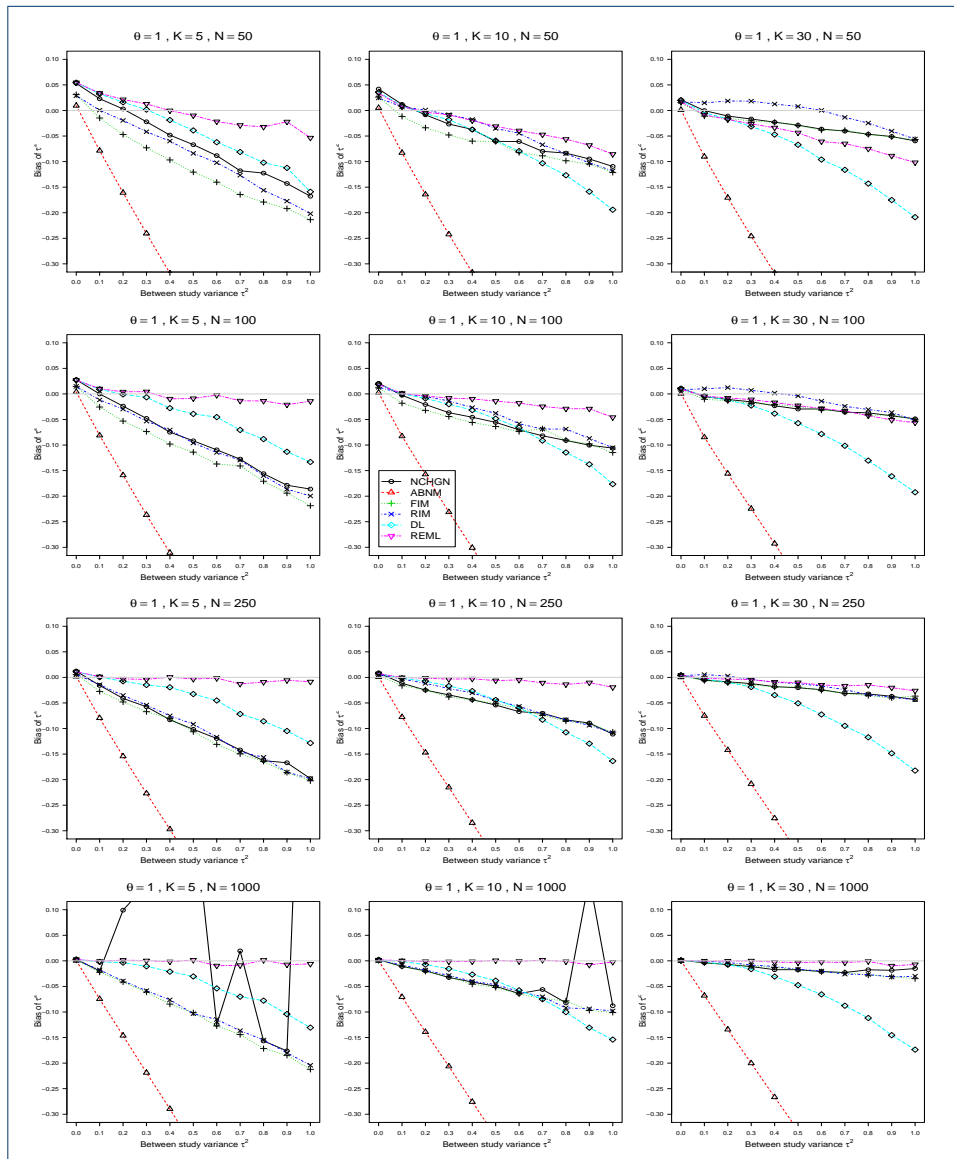

Figure A8: Bias of  $\tau^2$  in the REM when  $p_{i2} = 0.2$ ,  $\theta = 1$ ,  $0 \leq \tau^2 \leq 1$  and  $n = 50, 100, 250, 1000$ . Estimation methods are: pluses - unconditional generalized linear mixed-effects model with fixed study effects (FIM), crosses - unconditional generalized linear mixed-effects model with random study effects (RIM), circles - a conditional generalized linear mixed-effects model with exact likelihood (NCHGN), triangles - a conditional generalized linear mixed-effects model with approximate likelihood (ABNM), rhombs - DerSimonian and Laird method (DL) and reverse triangles - restricted maximum likelihood method (REML). Light grey line at 0.

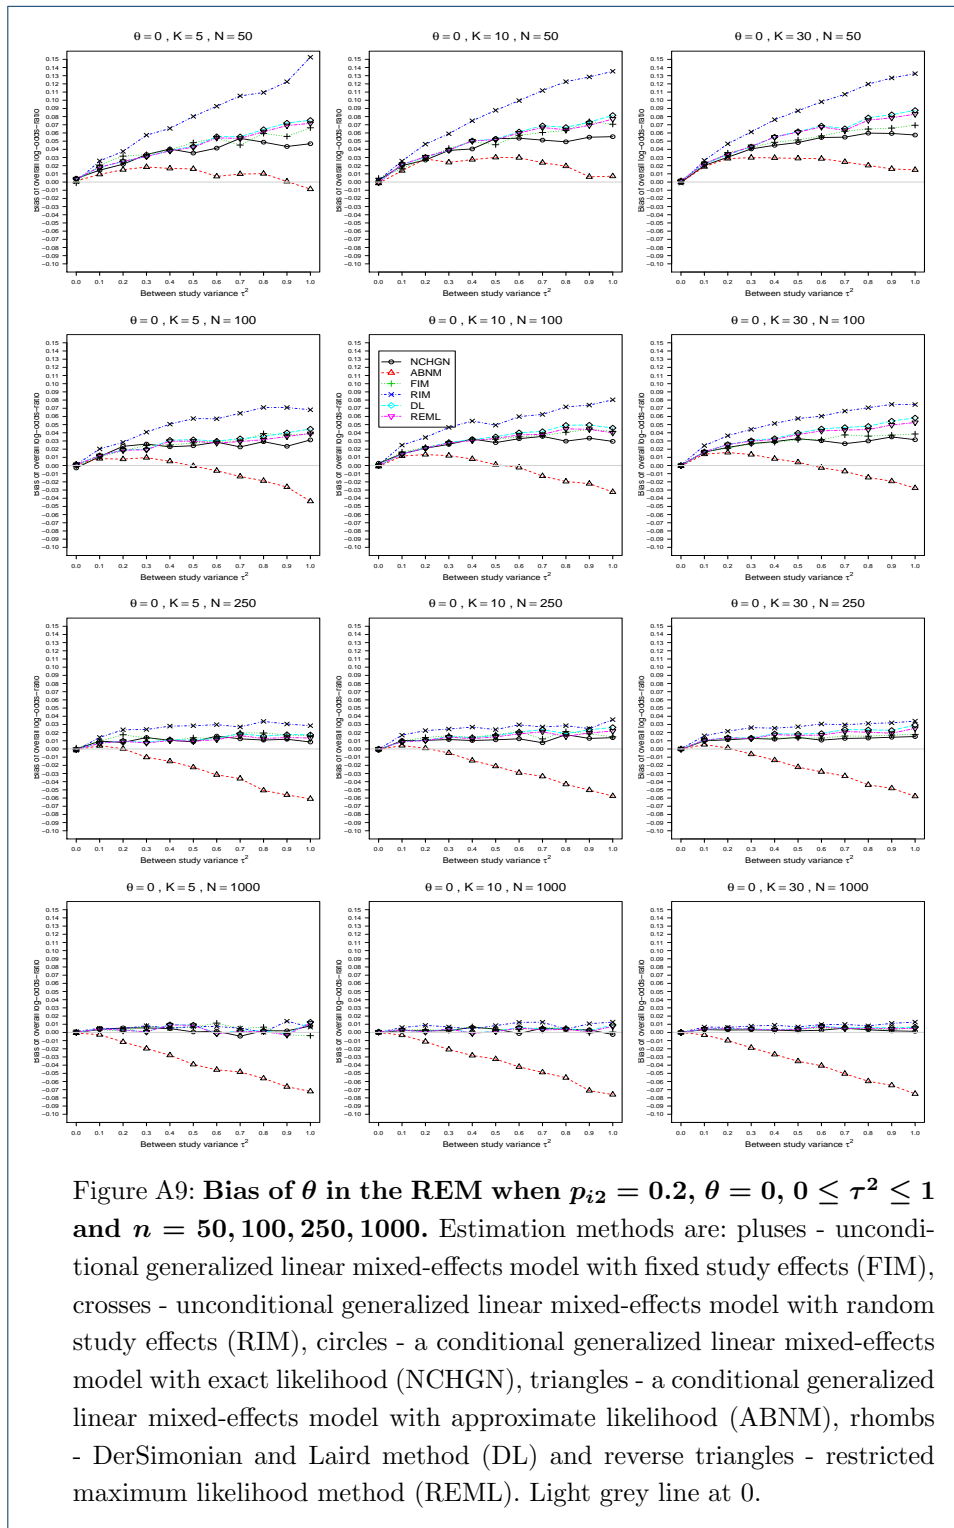

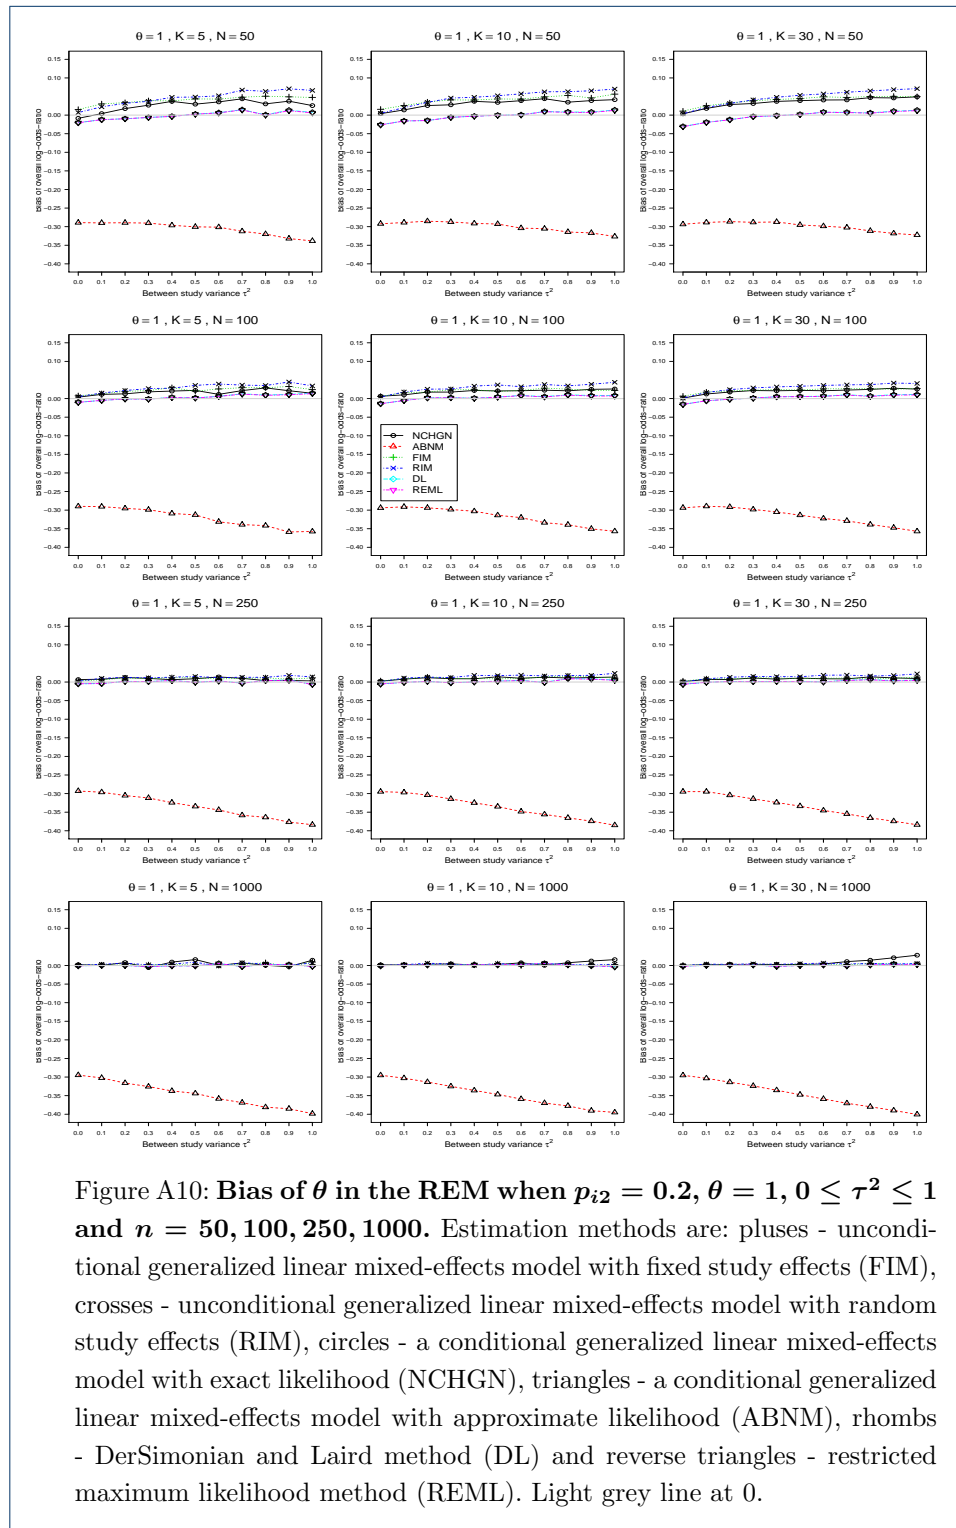



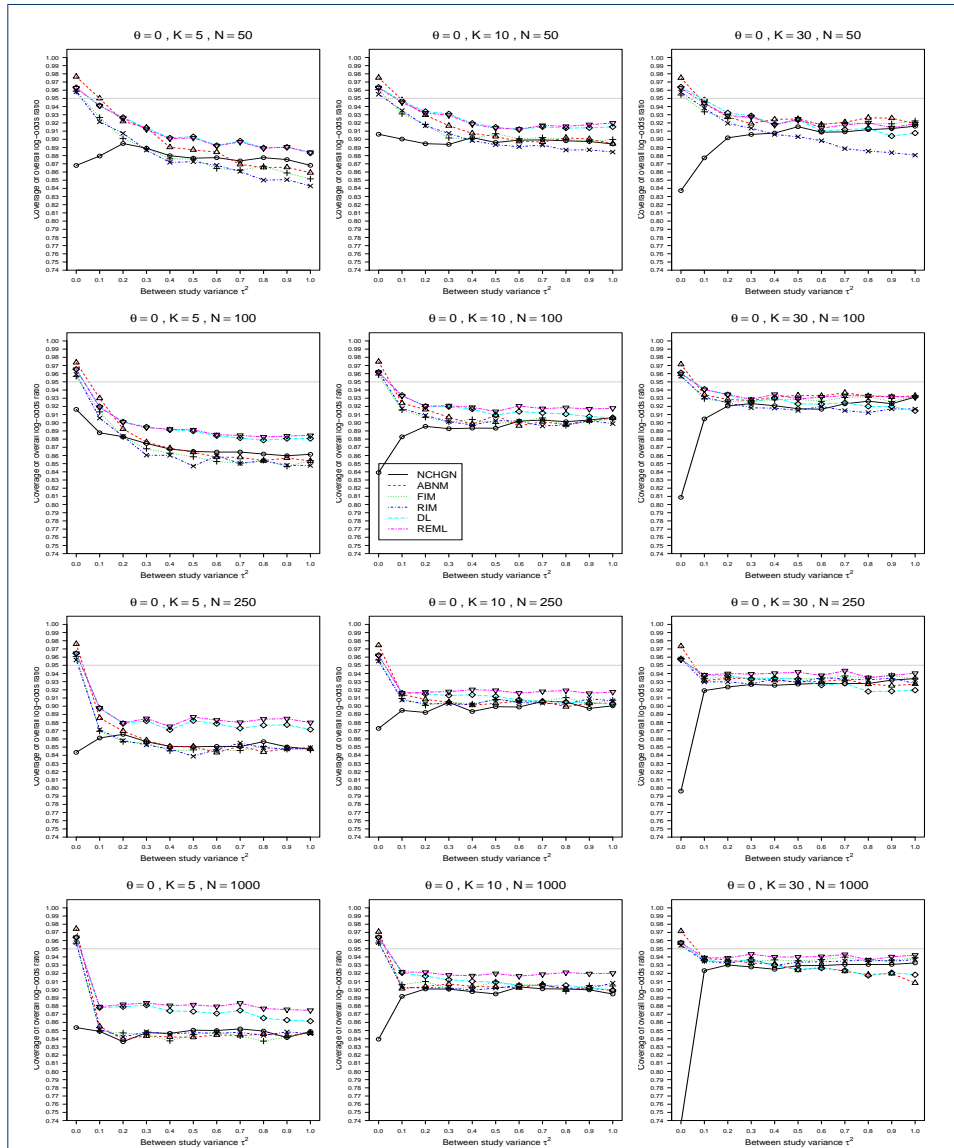

Figure A11: Estimated coverage of  $\theta$  in the REM when  $p_{i2} = 0.2$ ,  $\theta = 0$ ,  $0 \leq \tau^2 \leq 1$  and  $n = 50, 100, 250, 1000$ . The coverages are given at the nominal 95% level. Estimation methods are: pluses - unconditional generalized linear mixed-effects model with fixed study effects (FIM), crosses - unconditional generalized linear mixed-effects model with random study effects (RIM), circles - a conditional generalized linear mixed-effects model with exact likelihood (NCHGN), triangles - a conditional generalized linear mixed-effects model with approximate likelihood (ABNM), rhombs - DerSimonian and Laird method (DL) and reverse triangles - restricted maximum likelihood method (REML). Light grey line at 0.95.

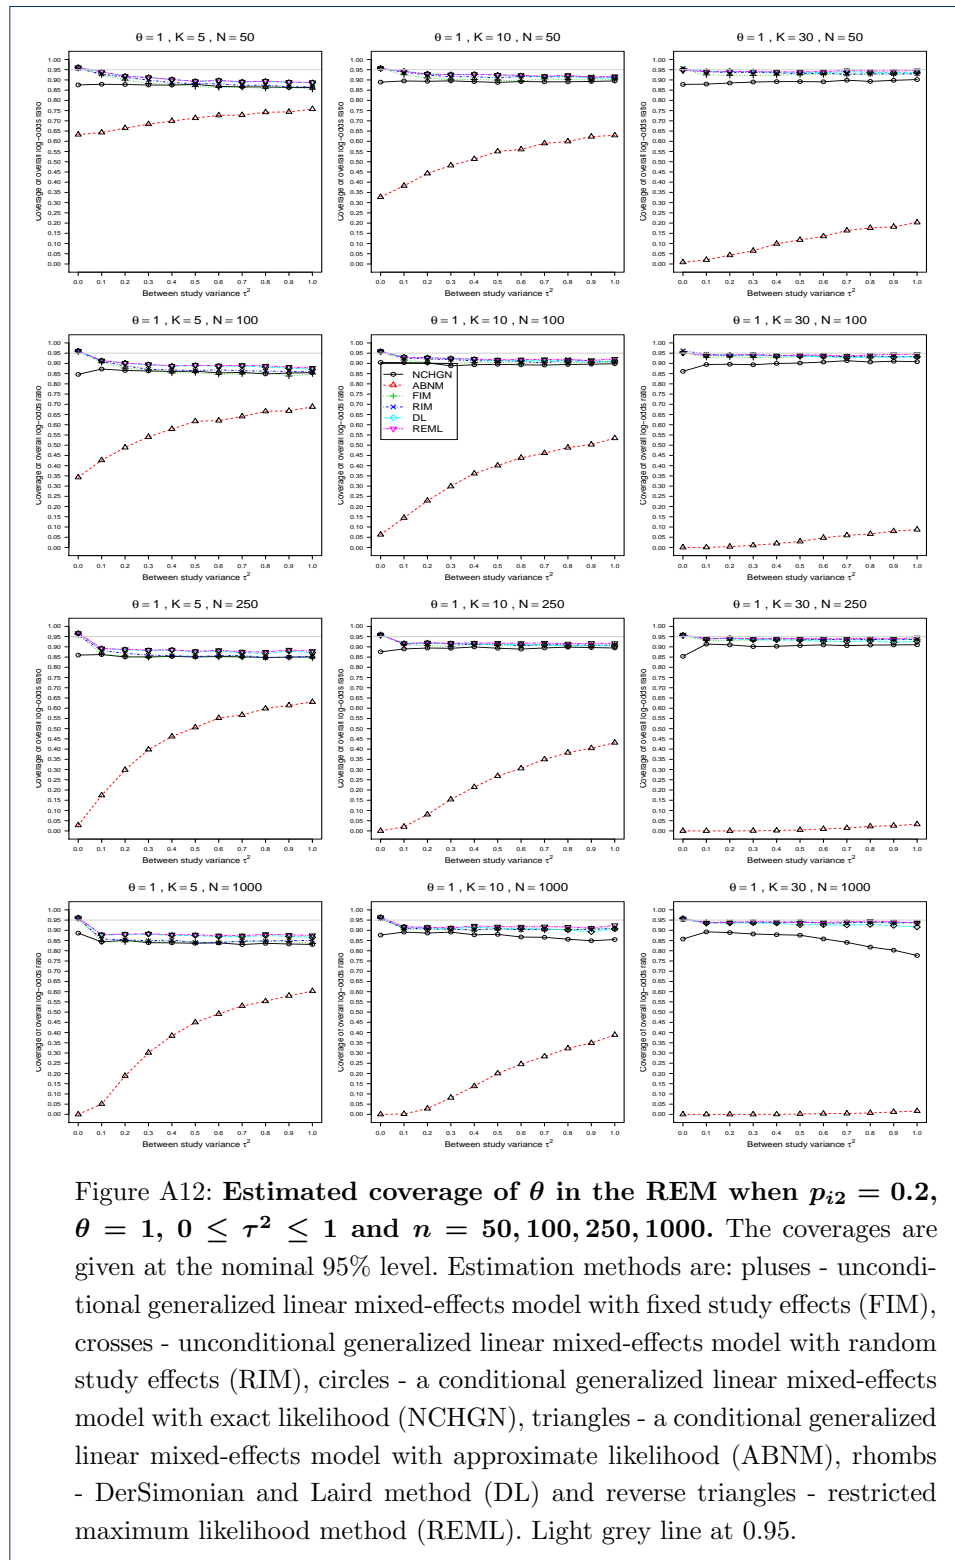

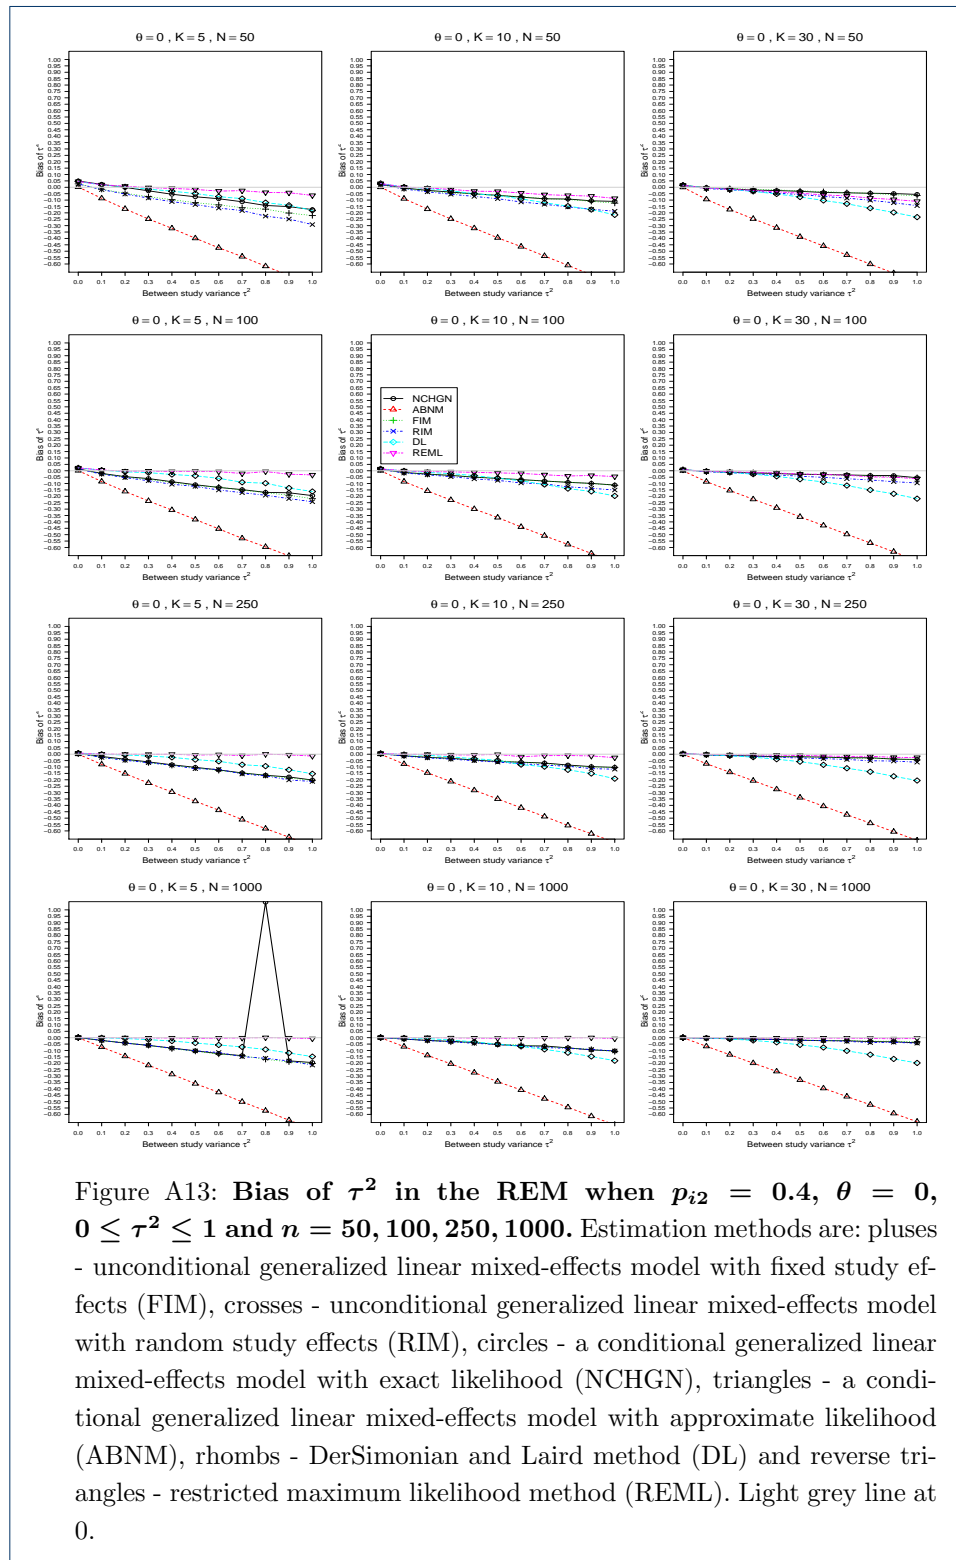

Figure A13: Bias of  $\tau^2$  in the REM when  $p_{i2} = 0.4$ ,  $\theta = 0$ ,  $0 \leq \tau^2 \leq 1$  and  $n = 50, 100, 250, 1000$ . Estimation methods are: pluses - unconditional generalized linear mixed-effects model with fixed study effects (FIM), crosses - unconditional generalized linear mixed-effects model with random study effects (RIM), circles - a conditional generalized linear mixed-effects model with exact likelihood (NCHGN), triangles - a conditional generalized linear mixed-effects model with approximate likelihood (ABNM), rhombs - DerSimonian and Laird method (DL) and reverse triangles - restricted maximum likelihood method (REML). Light grey line at 0.

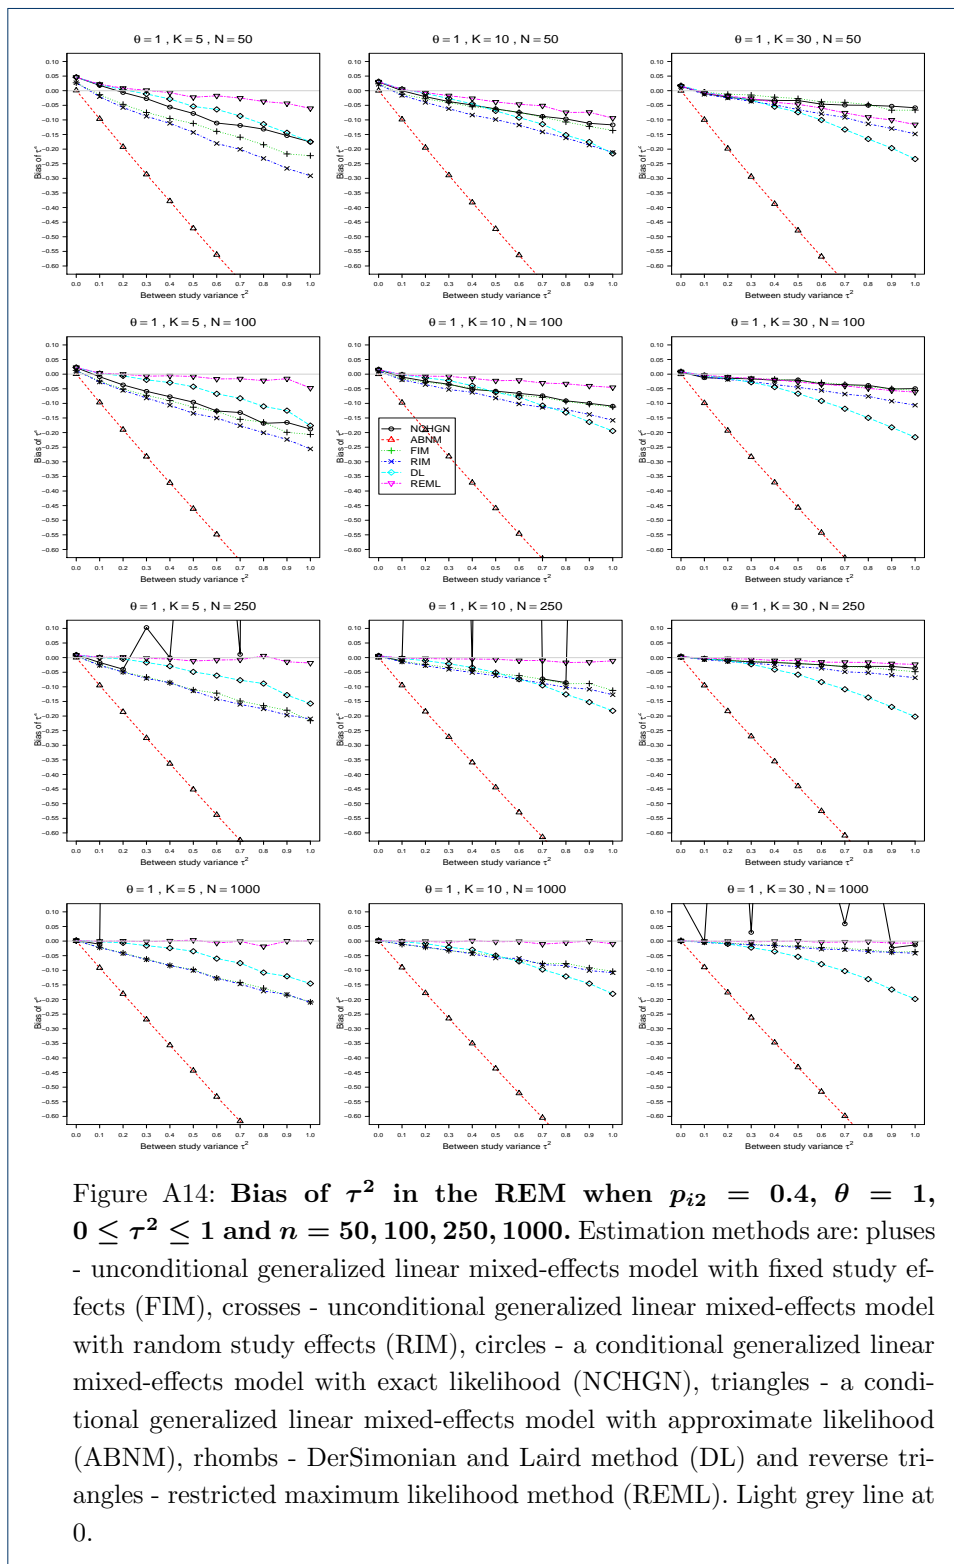

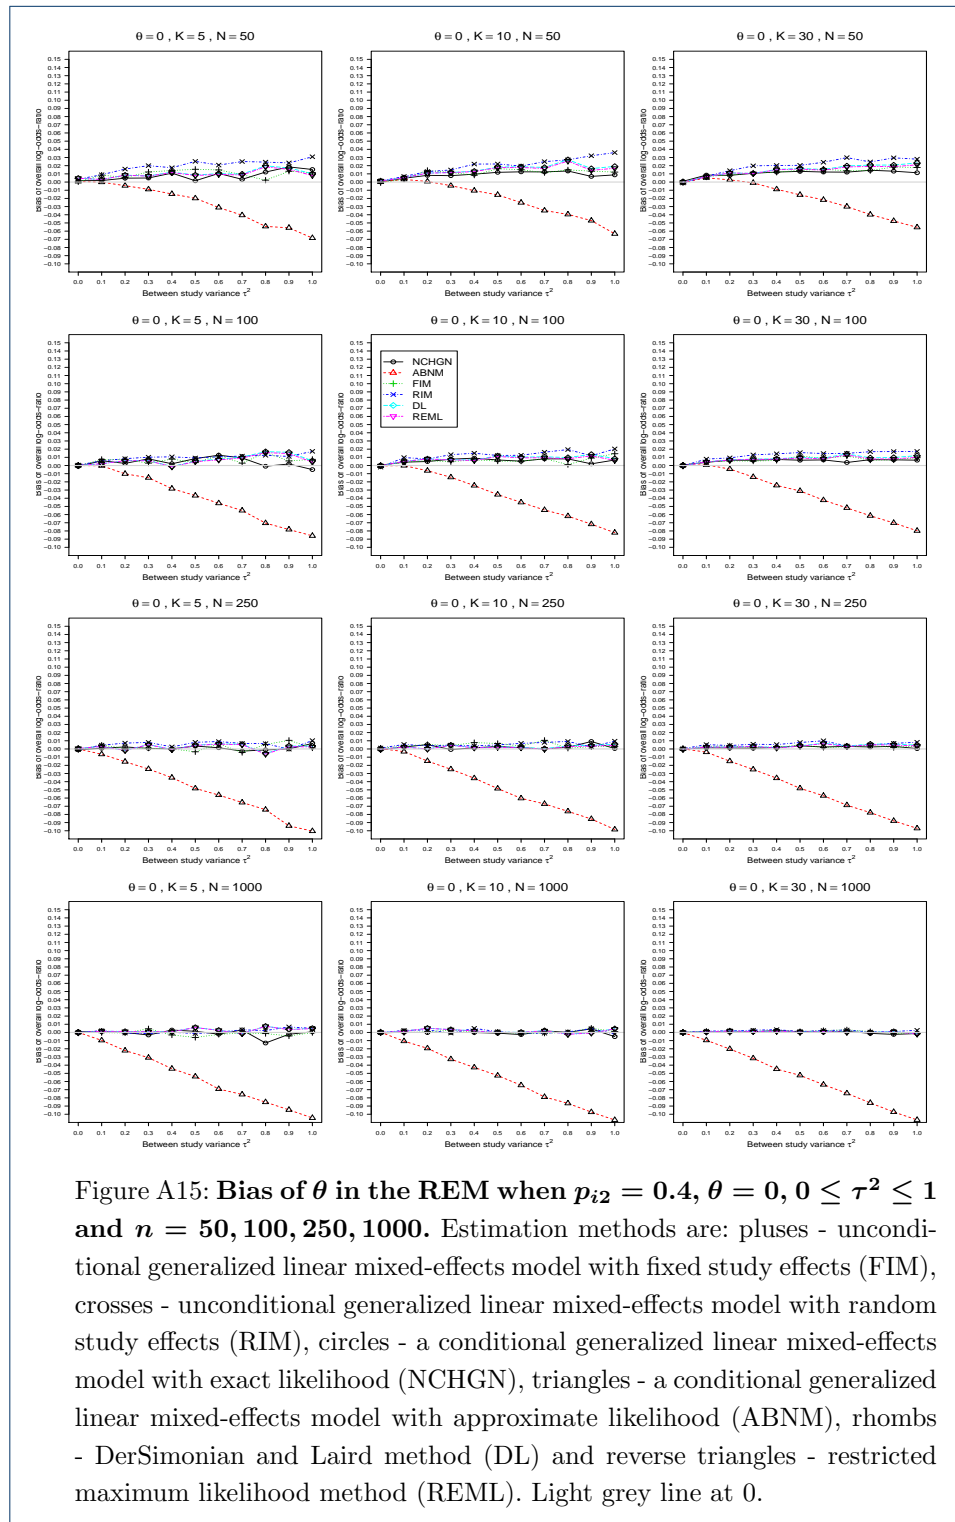

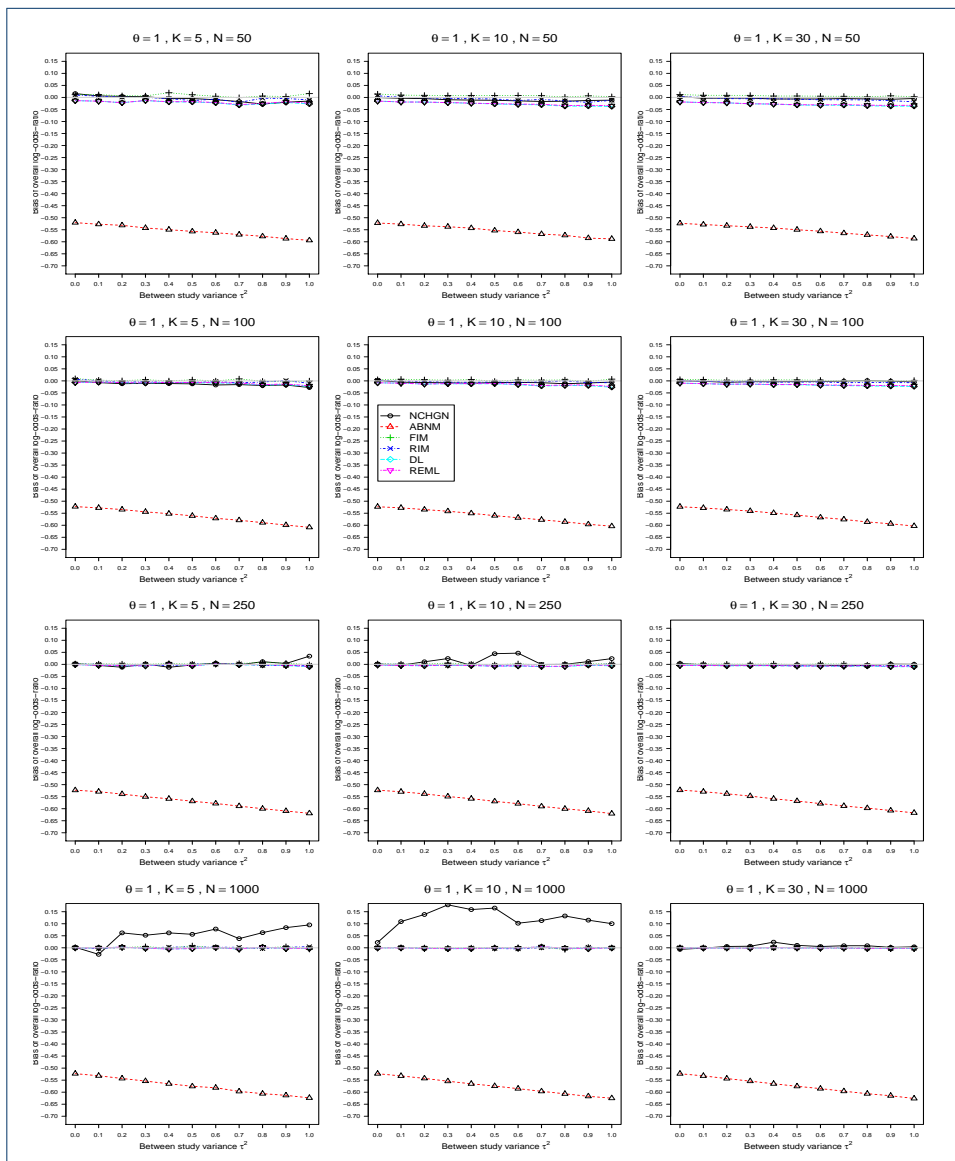

Figure A16: Bias of  $\theta$  in the REM when  $p_{i2} = 0.4, \theta = 1, 0 \leq \tau^2 \leq 1$  and  $n = 50, 100, 250, 1000$ . Estimation methods are: pluses - unconditional generalized linear mixed-effects model with fixed study effects (FIM), crosses - unconditional generalized linear mixed-effects model with random study effects (RIM), circles - a conditional generalized linear mixed-effects model with exact likelihood (NCHGN), triangles - a conditional generalized linear mixed-effects model with approximate likelihood (ABNM), rhombs - DerSimonian and Laird method (DL) and reverse triangles - restricted maximum likelihood method (REML). Light grey line at 0.

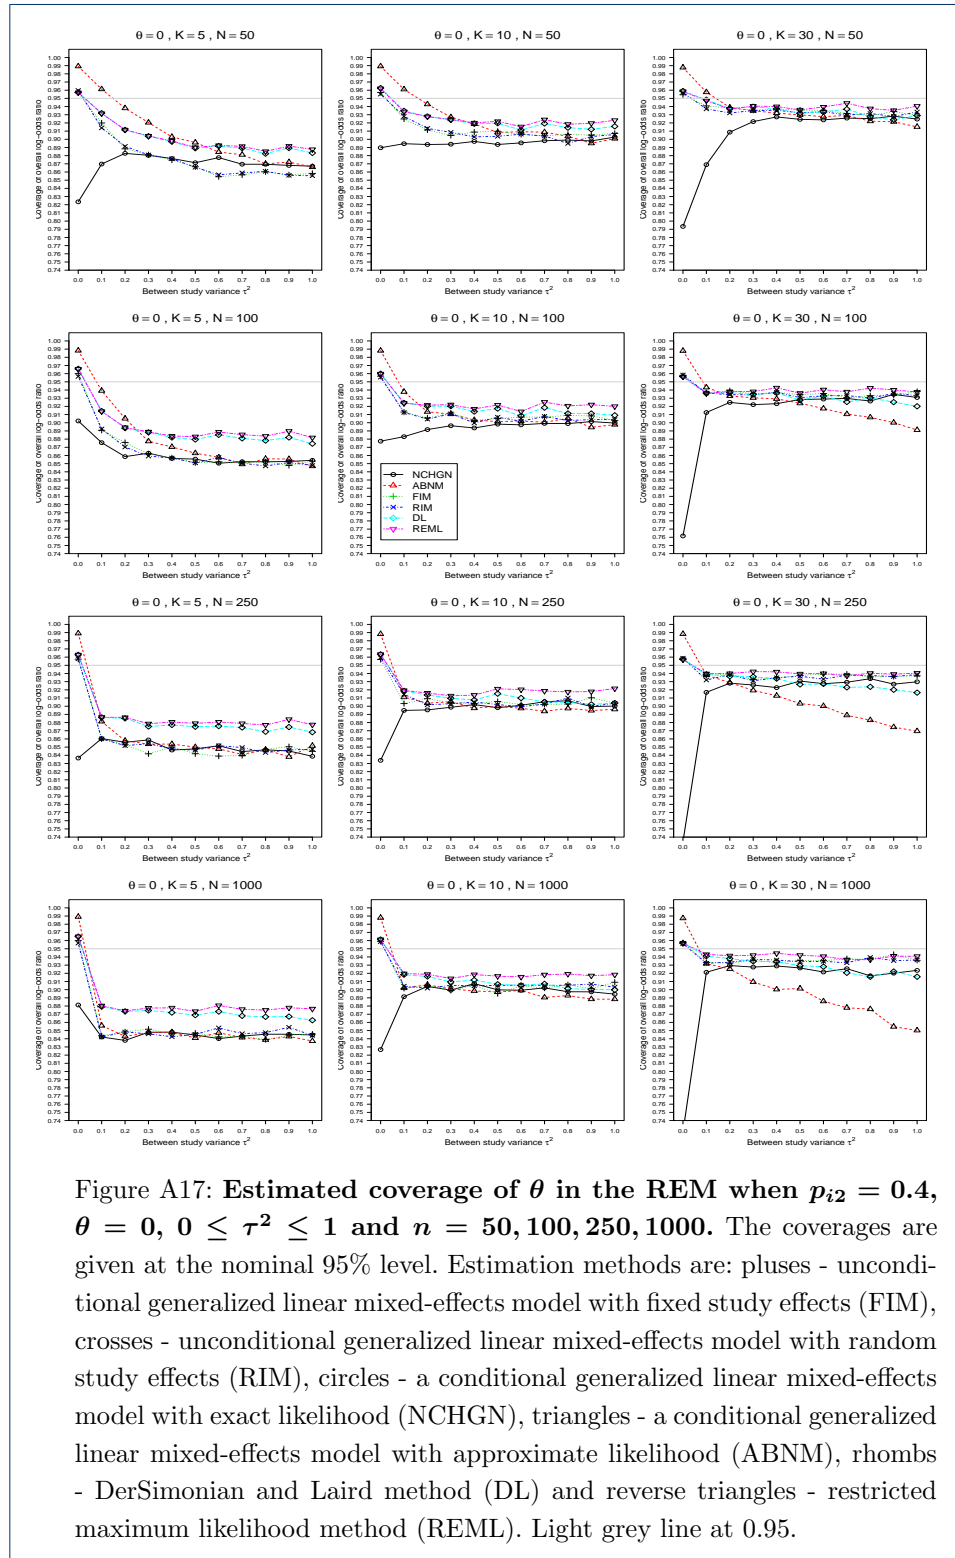

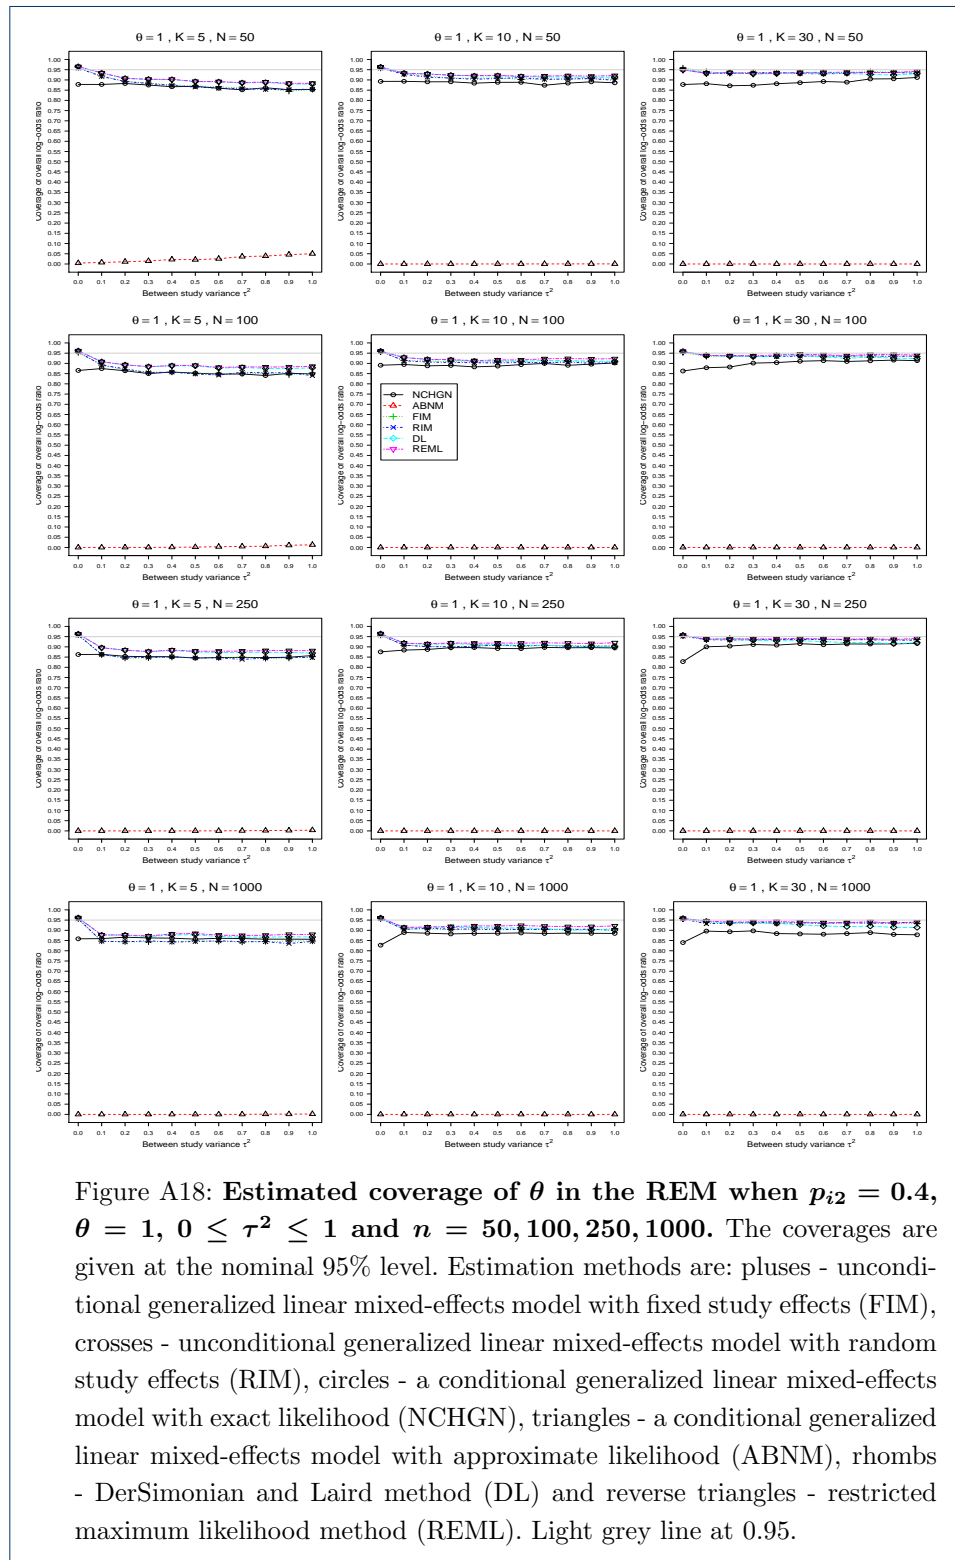

Supplement: 12874_2018_531_MOESM2_ESM.pdf [file 12874_2018_531_MOESM2_ESM.pdf]
