# Supplementary material for: Meta-analysis of binary outcomes via generalized linear mixed models: a simulation study
Source: PubMed Central journal article supplement (PMC6032567; doi:10.1186/s12874-018-0531-9), 2018-07-04
Supplement: 12874_2018_531_MOESM1_ESM.pdf [file 12874_2018_531_MOESM1_ESM.pdf]

## Additional file 1 - metafor syntax for GLMM in R

In *metafor*, the NCHGN model is specified as

```
rma.glmm(measure = "OR", ai =, bi =, ci =, di =, data =, model = "CM.EL").
```

To use the “dnoncenhypergeom” function for noncentral-hypergeometric distribution or a specific optimizer such as “optim”, “bobyqa”, “newuoa”, or “uobyqa”, the model should be specified as

```
rma.glmm(measure = "OR", ai =, bi =, ci =, di =,
          model = "CM.EL", control = list(dnchgc = "dnoncenhypergeom"))
```

and

```
rma.glmm(measure = "OR", ai =, bi =, ci =, di =,
          model = "CM.EL", control = list(optimizer = "optim"))
```

where  $ai$ ,  $bi$ ,  $ci$ ,  $di$  are the binomial data from the table

|           | Event     | No event  | Total               |
|-----------|-----------|-----------|---------------------|
| Treatment | $ai$      | $bi$      | $ai + bi$           |
| Control   | $ci$      | $di$      | $ci + di$           |
| Total     | $ai + ci$ | $bi + di$ | $ai + bi + ci + di$ |

The two methods (“dFNCHypergeo” and “dnoncenhypergeom”) should perform similarly, when fitting the conditional GLMM (exact likelihood). However, convergence problems might occur when trying to fit a saturated model. Switching to an alternative method can help to solve the problem.

With small numbers of events, the binomial-normal approximation may be used. Then the model is a conditional GLMM (approximate likelihood). This model is specified as

```
rma.glmm(measure = "OR", ai =, bi =, ci =, di =, data =, model = "CM.AL").
```
