# Supplementary material for: Meta-analysis of binary outcomes via generalized linear mixed models: a simulation study
Source: PubMed Central journal article supplement (PMC6032567; doi:10.1186/s12874-018-0531-9), 2018-07-04

## Additional file 4 - Simulation results for comparison of dFNCHypergeo and dnoncenhypergeom in a conditional GLMM with exact likelihood

Figures [A1-A3](#) show the results for bias of estimation of between-study variance  $\tau^2$ , bias of estimates of overall effect measure  $\hat{\theta}$  and estimated coverage of overall effect measure  $\hat{\theta}$  in the random-effects model.

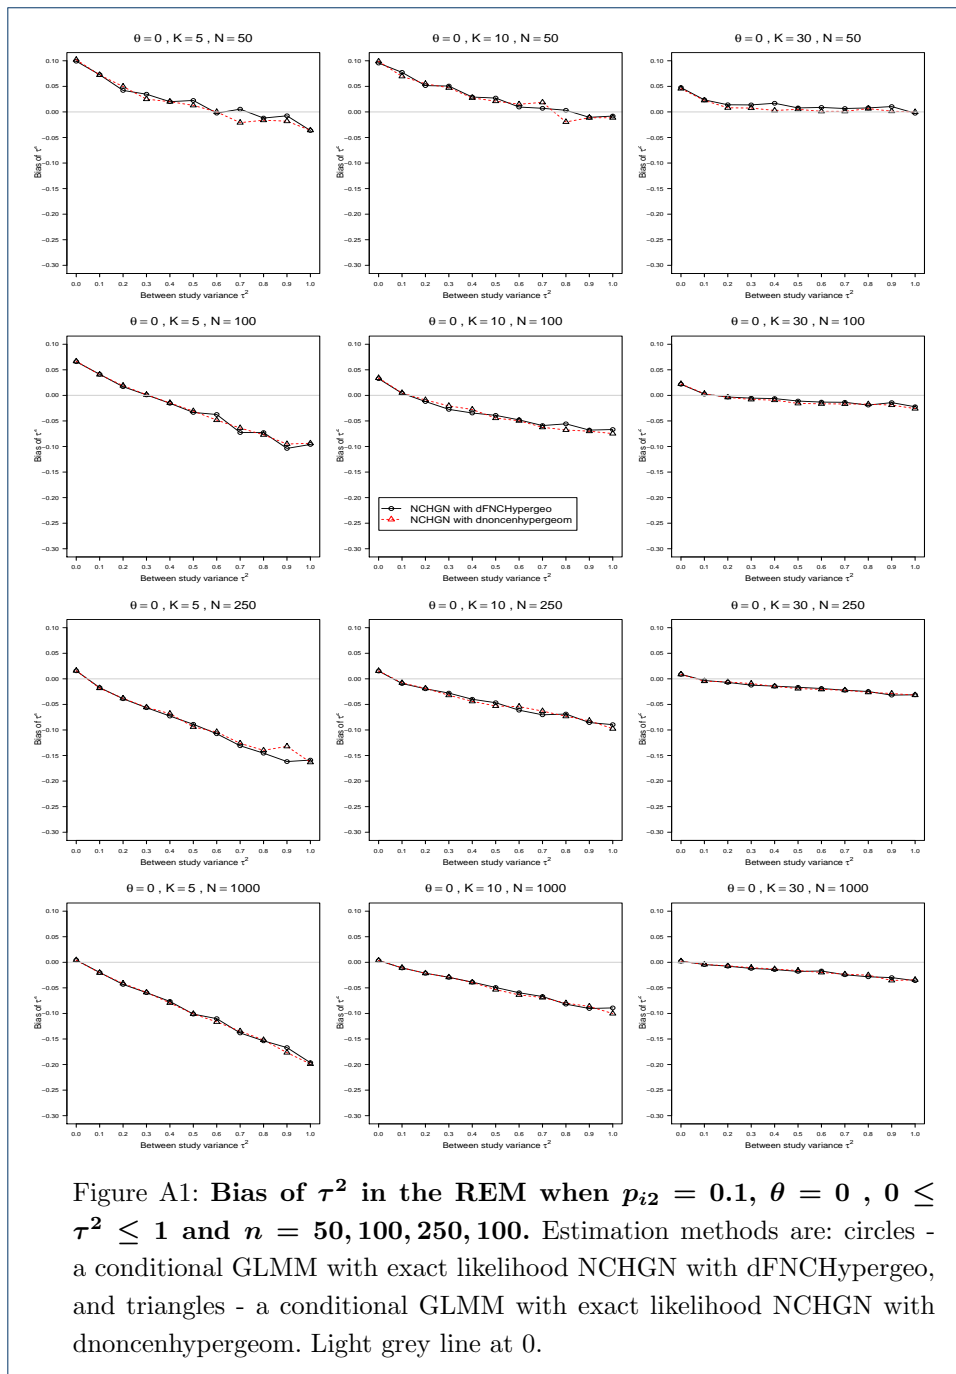

Figure A1: Bias of  $\tau^2$  in the REM when  $p_{i2} = 0.1$ ,  $\theta = 0$ ,  $0 \leq \tau^2 \leq 1$  and  $n = 50, 100, 250, 1000$ . Estimation methods are: circles - a conditional GLMM with exact likelihood NCHGN with dFNCHypergeo, and triangles - a conditional GLMM with exact likelihood NCHGN with dnoncenhypergeo. Light grey line at 0.

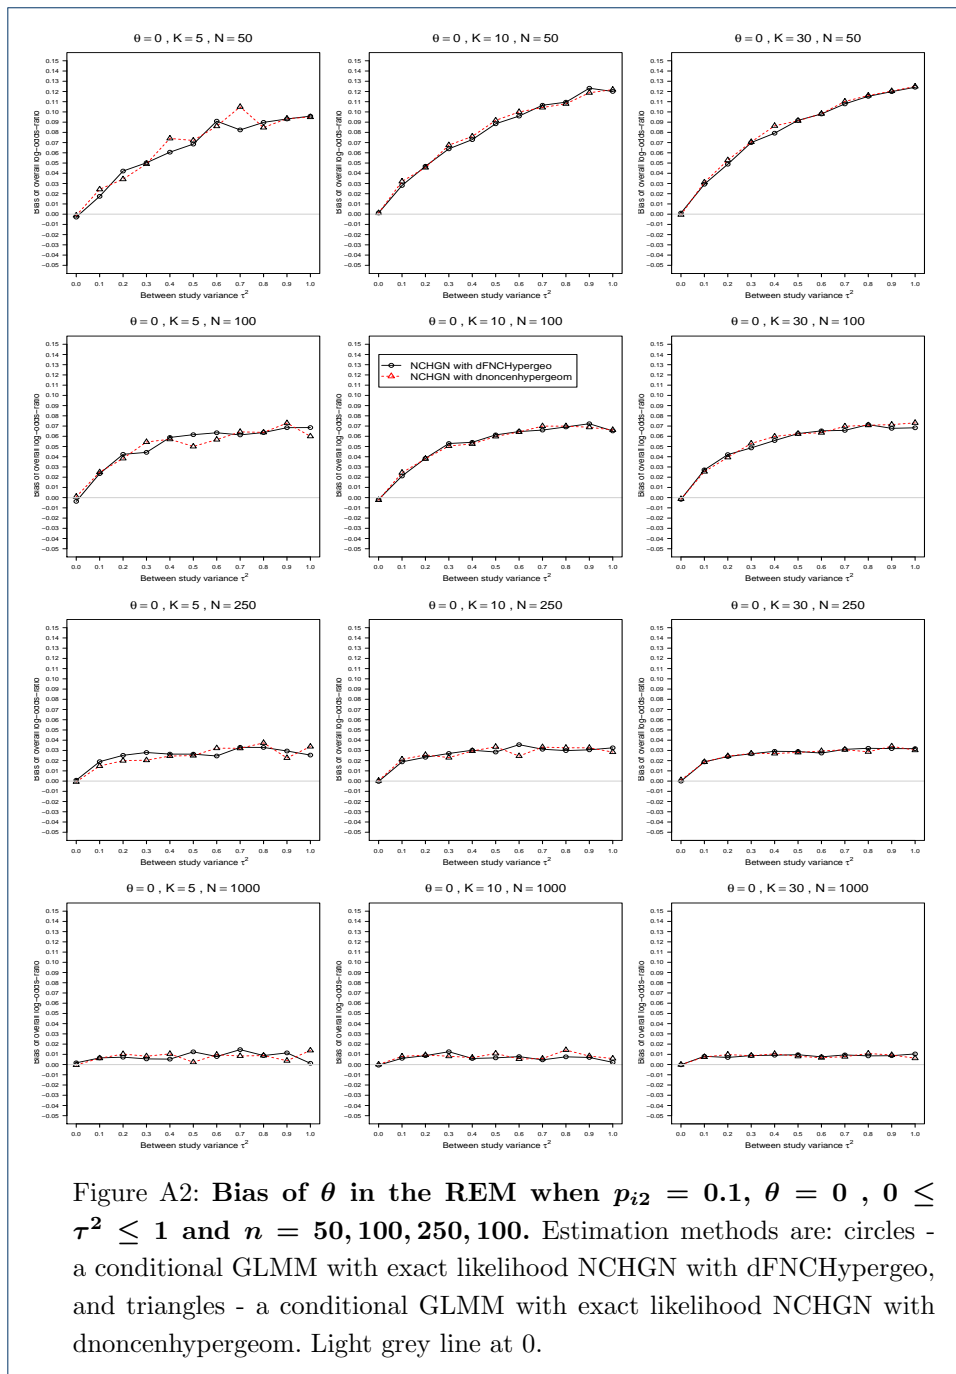

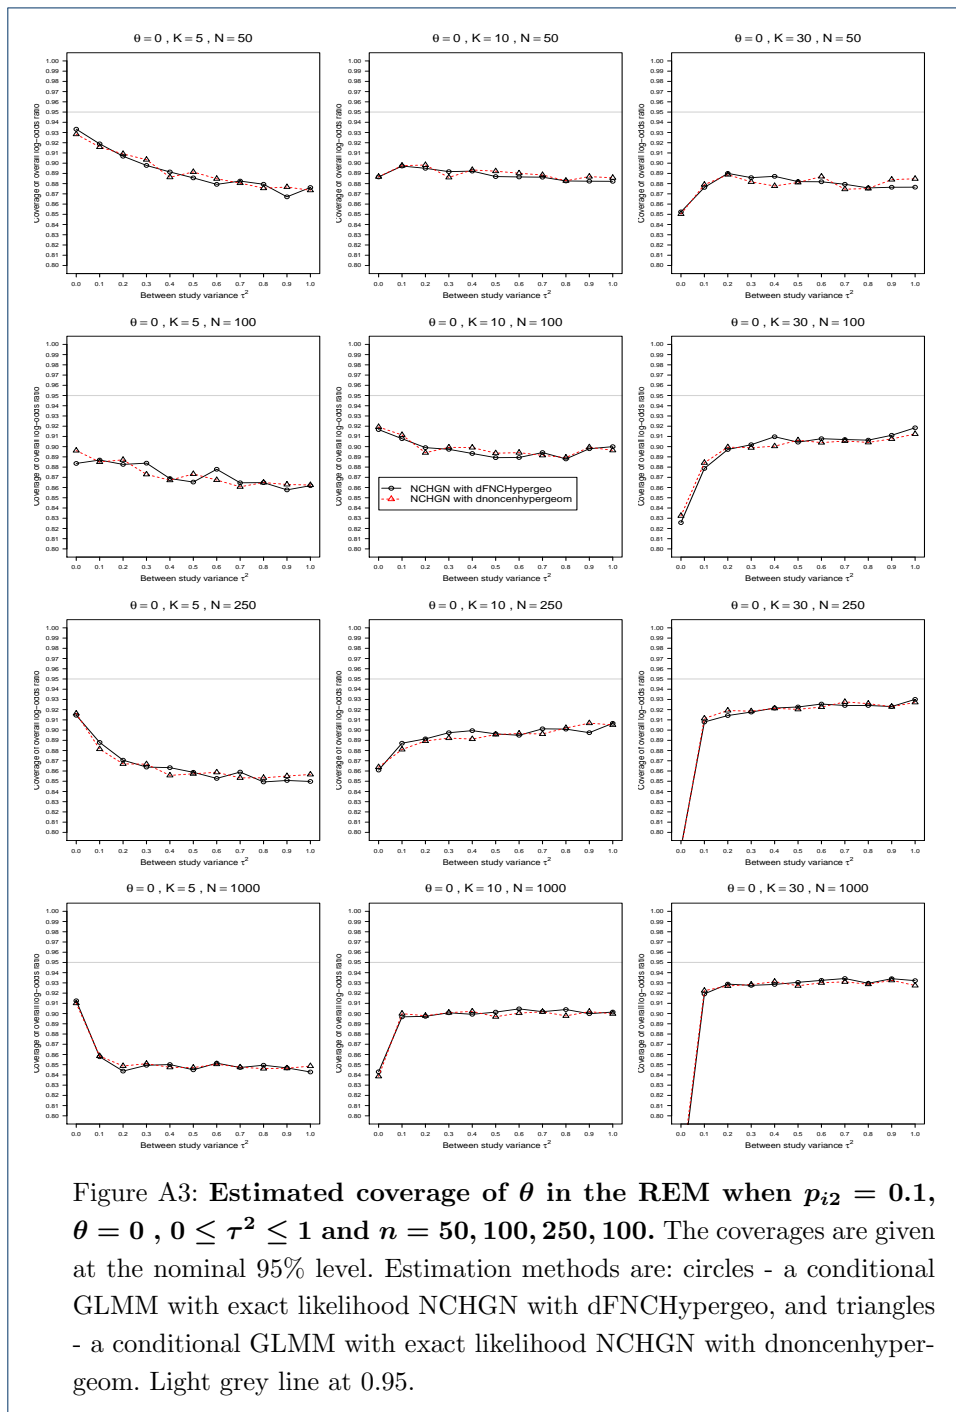

Supplement: 12874_2018_531_MOESM4_ESM.pdf [file 12874_2018_531_MOESM4_ESM.pdf]
