# Supplementary material for: Meta-analysis of binary outcomes via generalized linear mixed models: a simulation study
Source: PubMed Central journal article supplement (PMC6032567; doi:10.1186/s12874-018-0531-9), 2018-07-04
Supplement: 12874_2018_531_MOESM5_ESM.pdf [file 12874_2018_531_MOESM5_ESM.pdf]

## Additional file 5 - Computational issues

Figures [A19-A28](#) show the results for convergence and estimation quality of alternative optimizers.

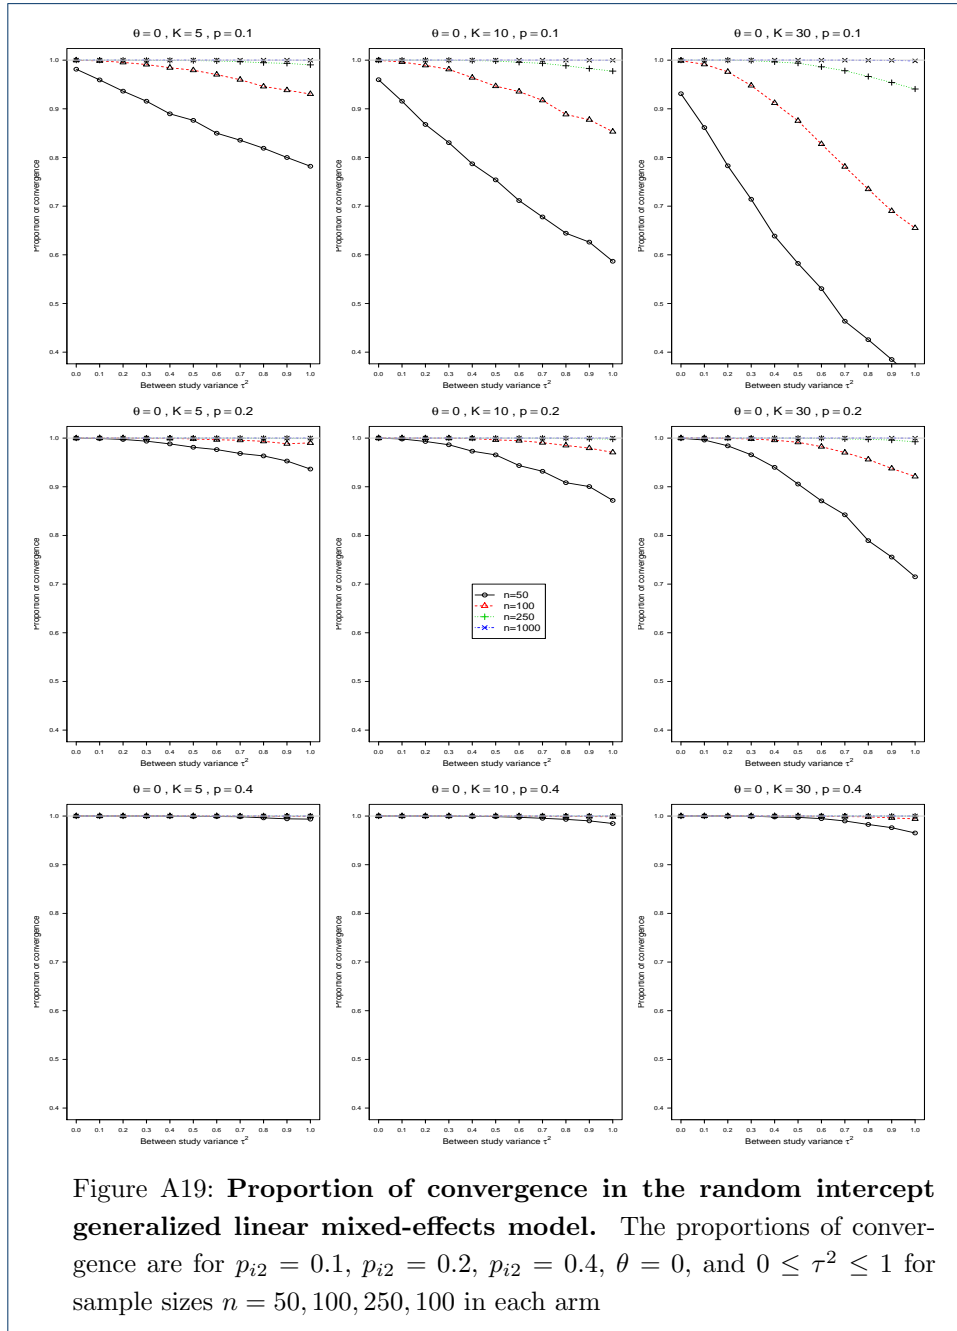

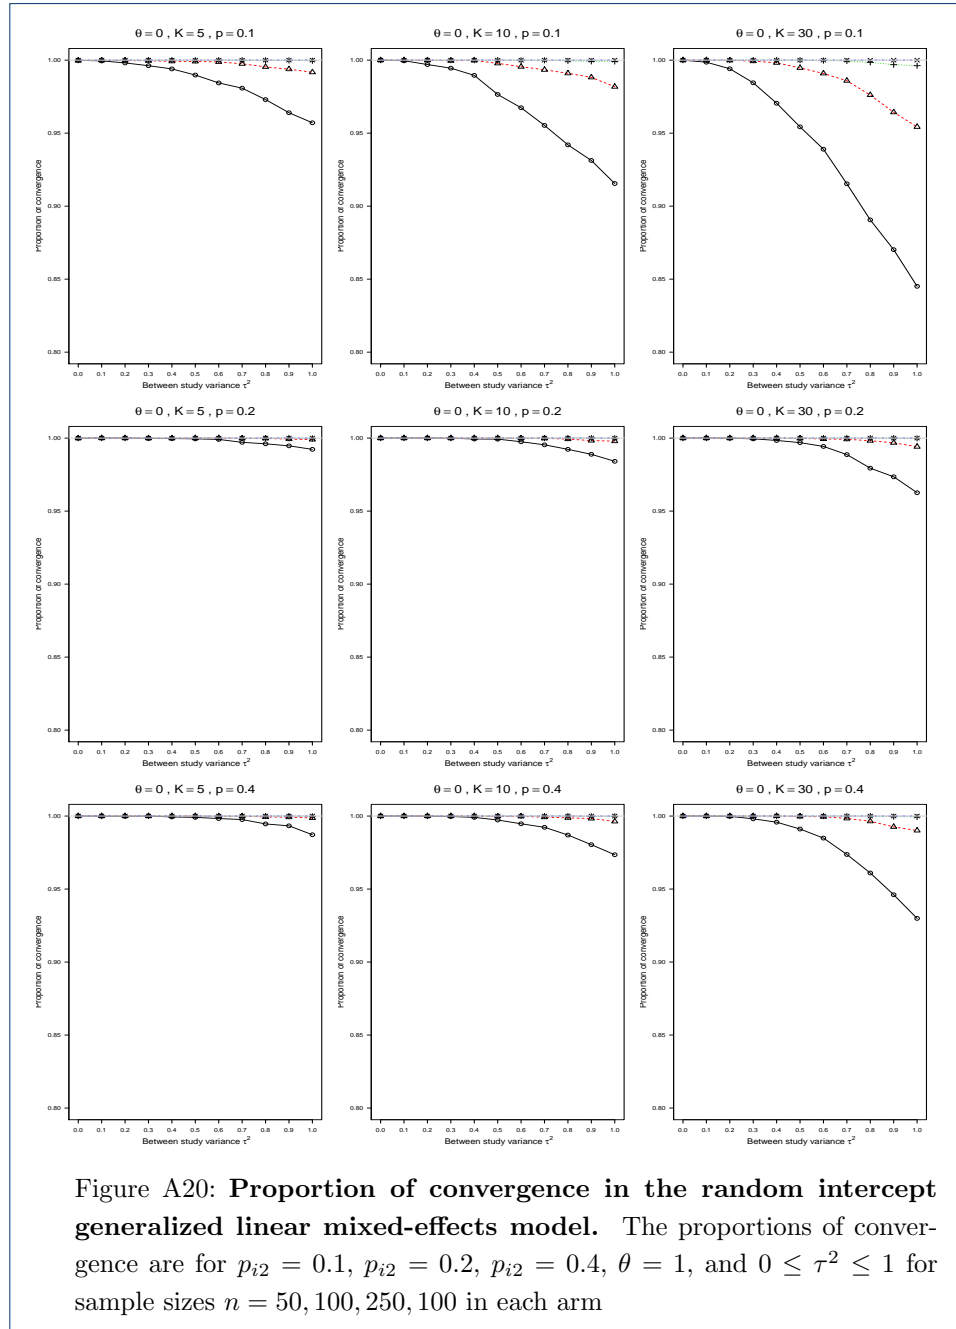

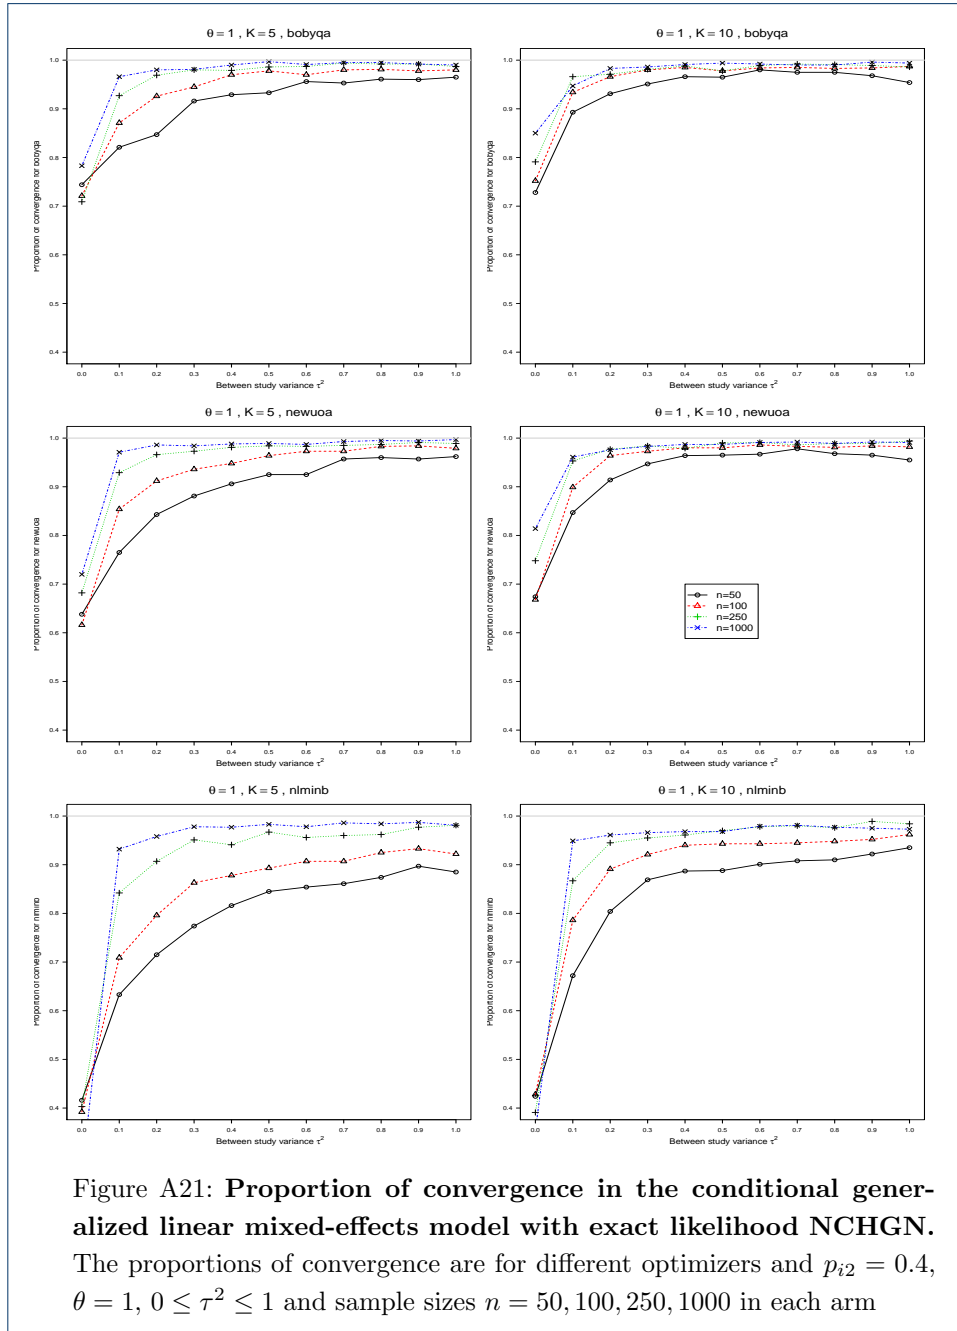

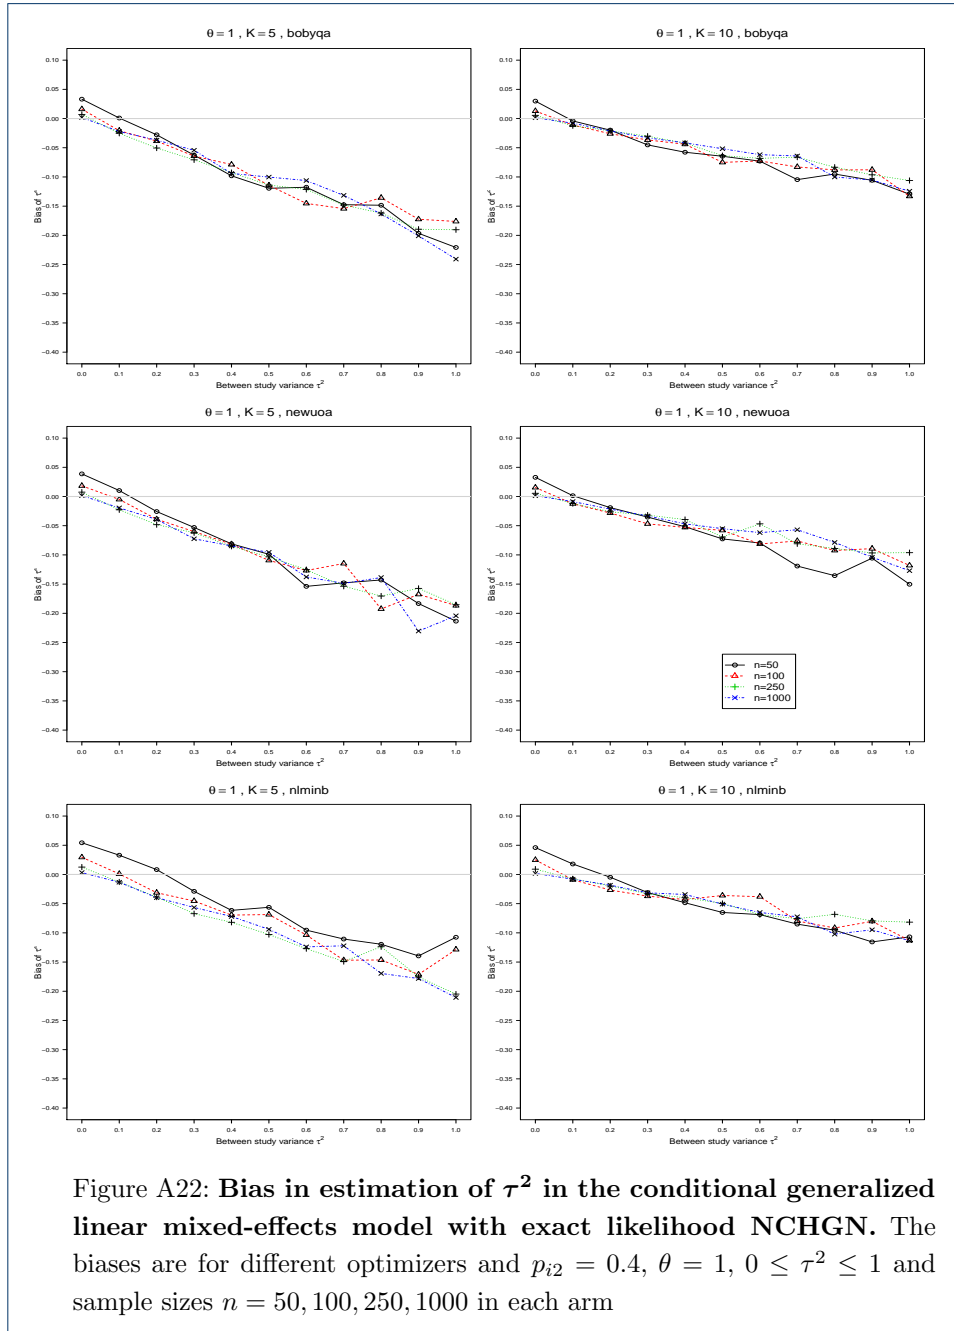

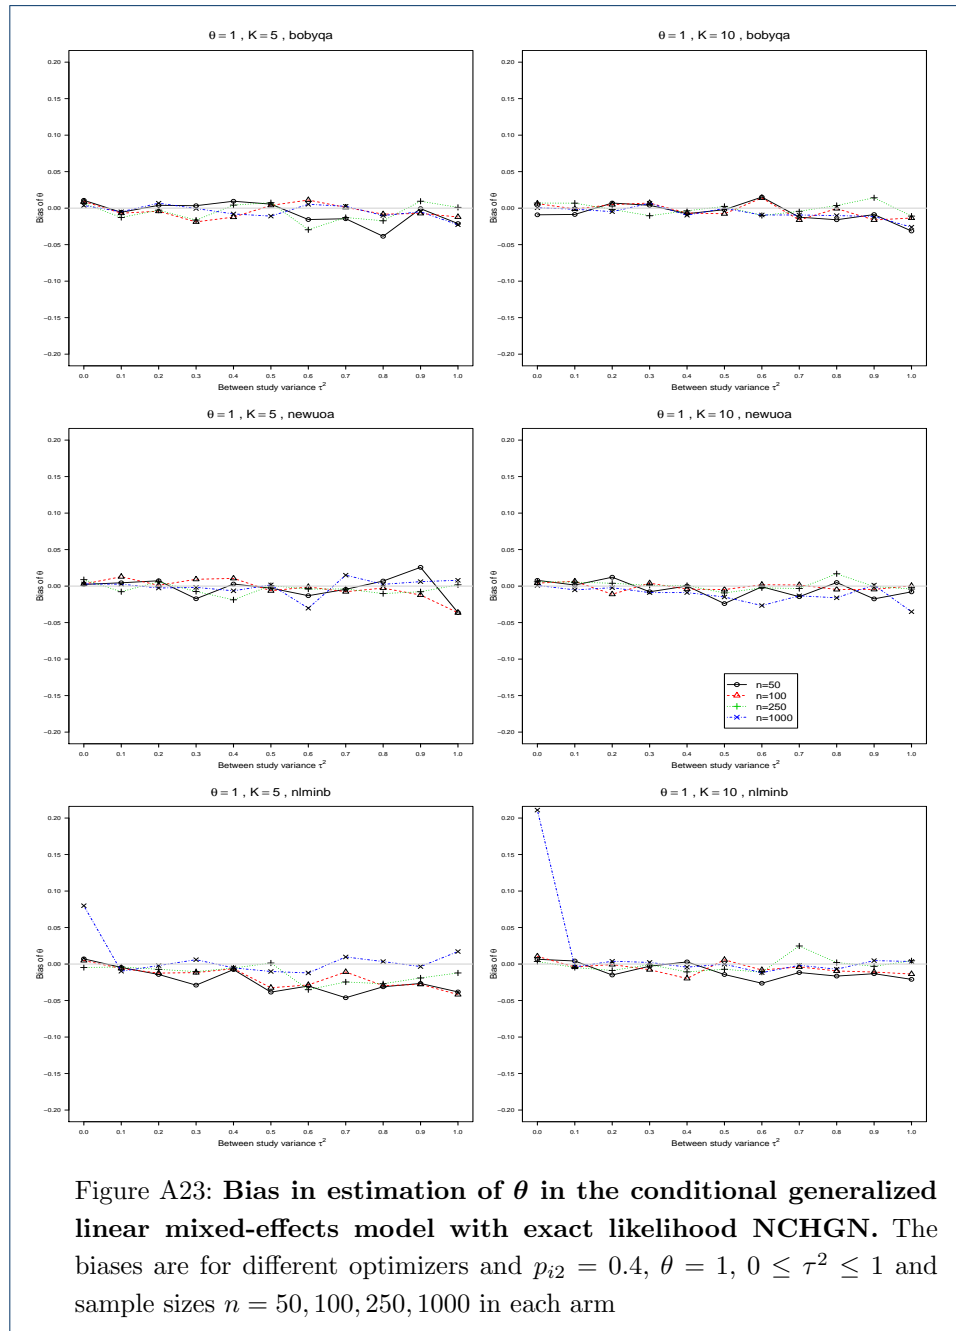

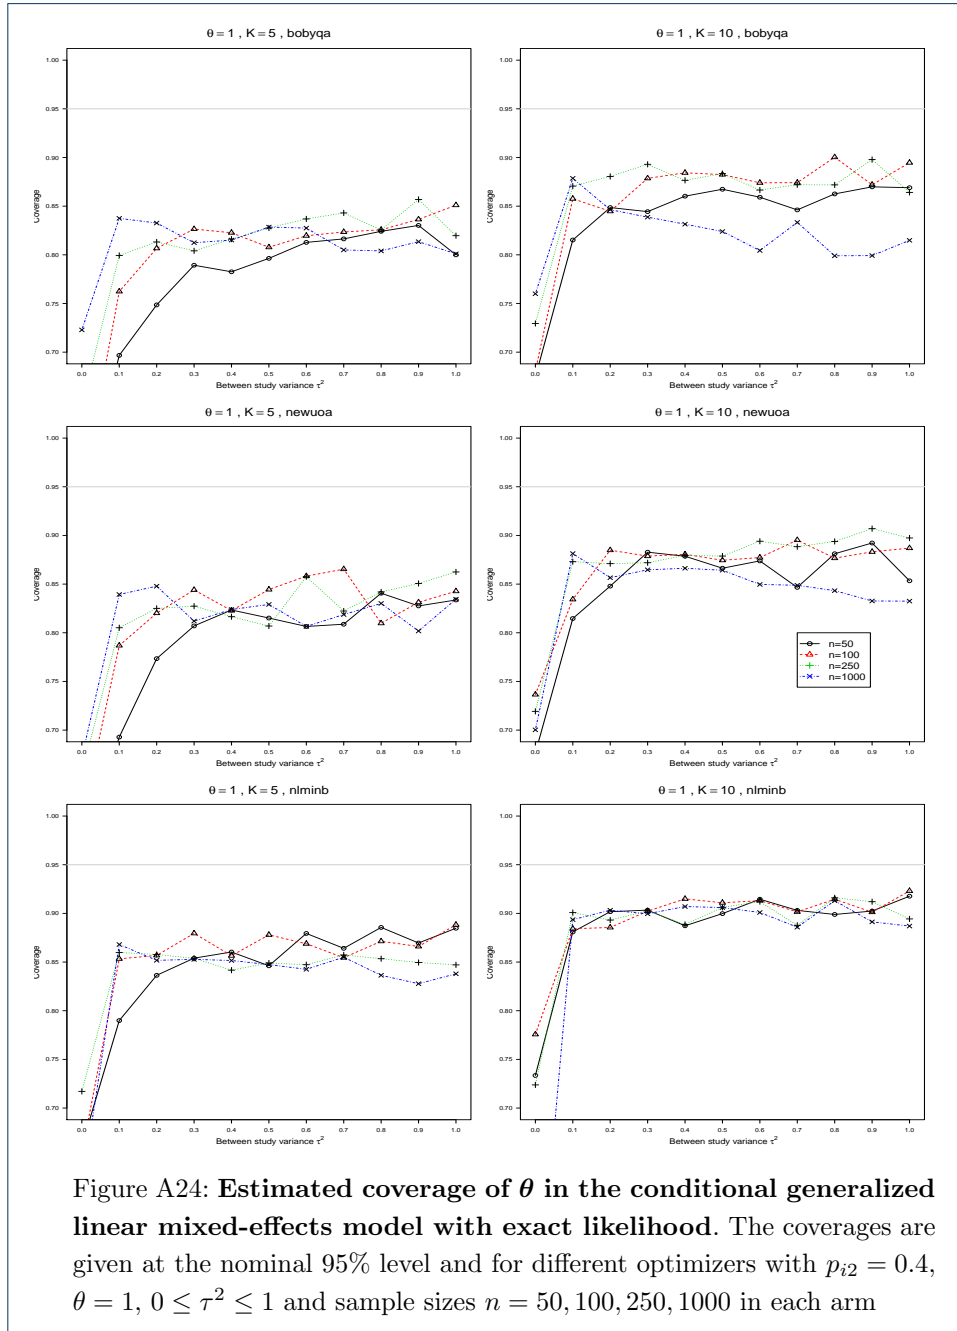

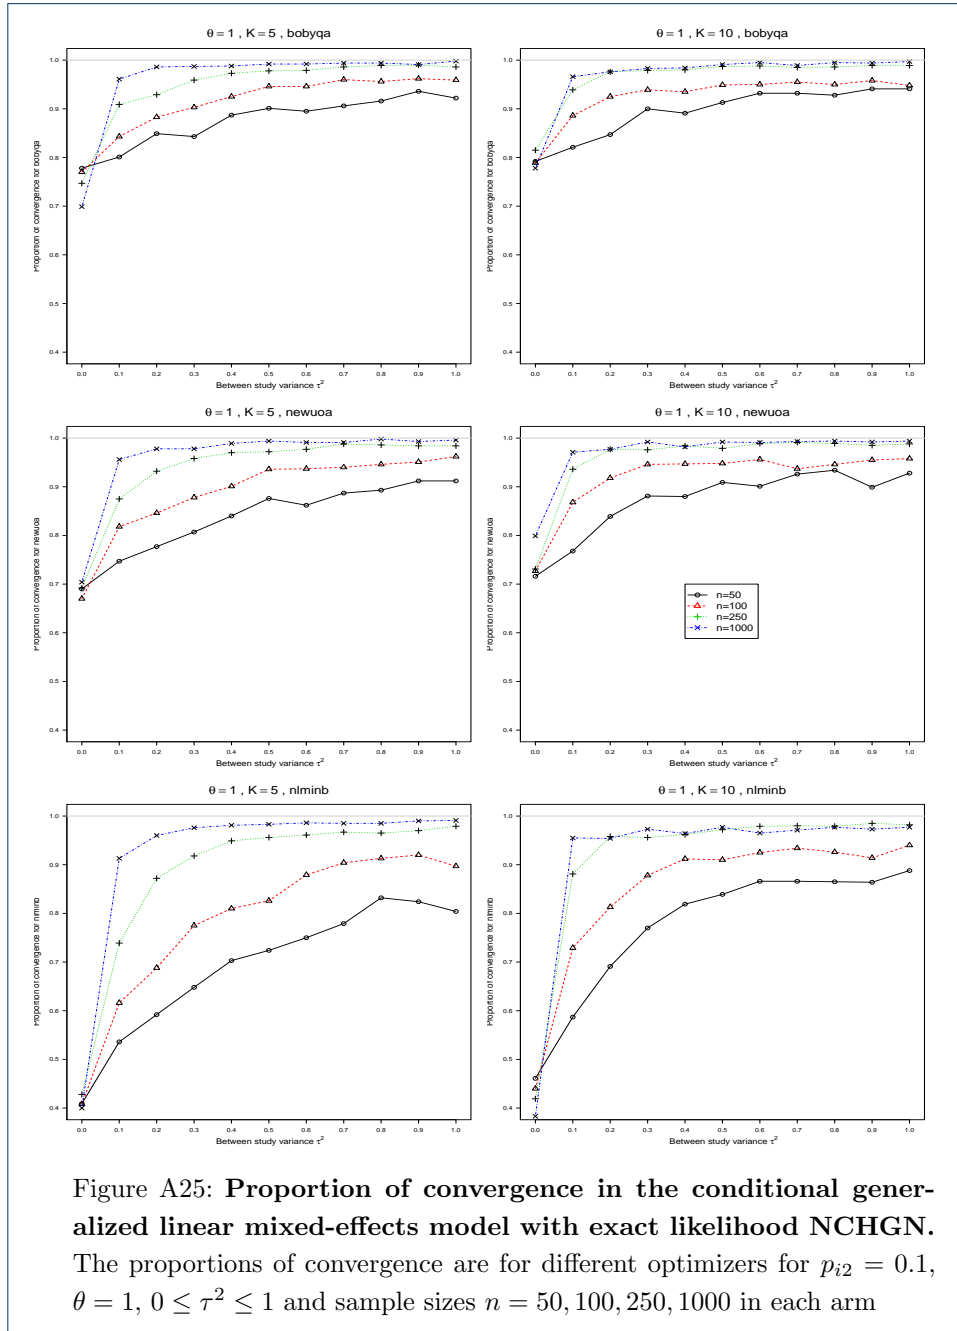



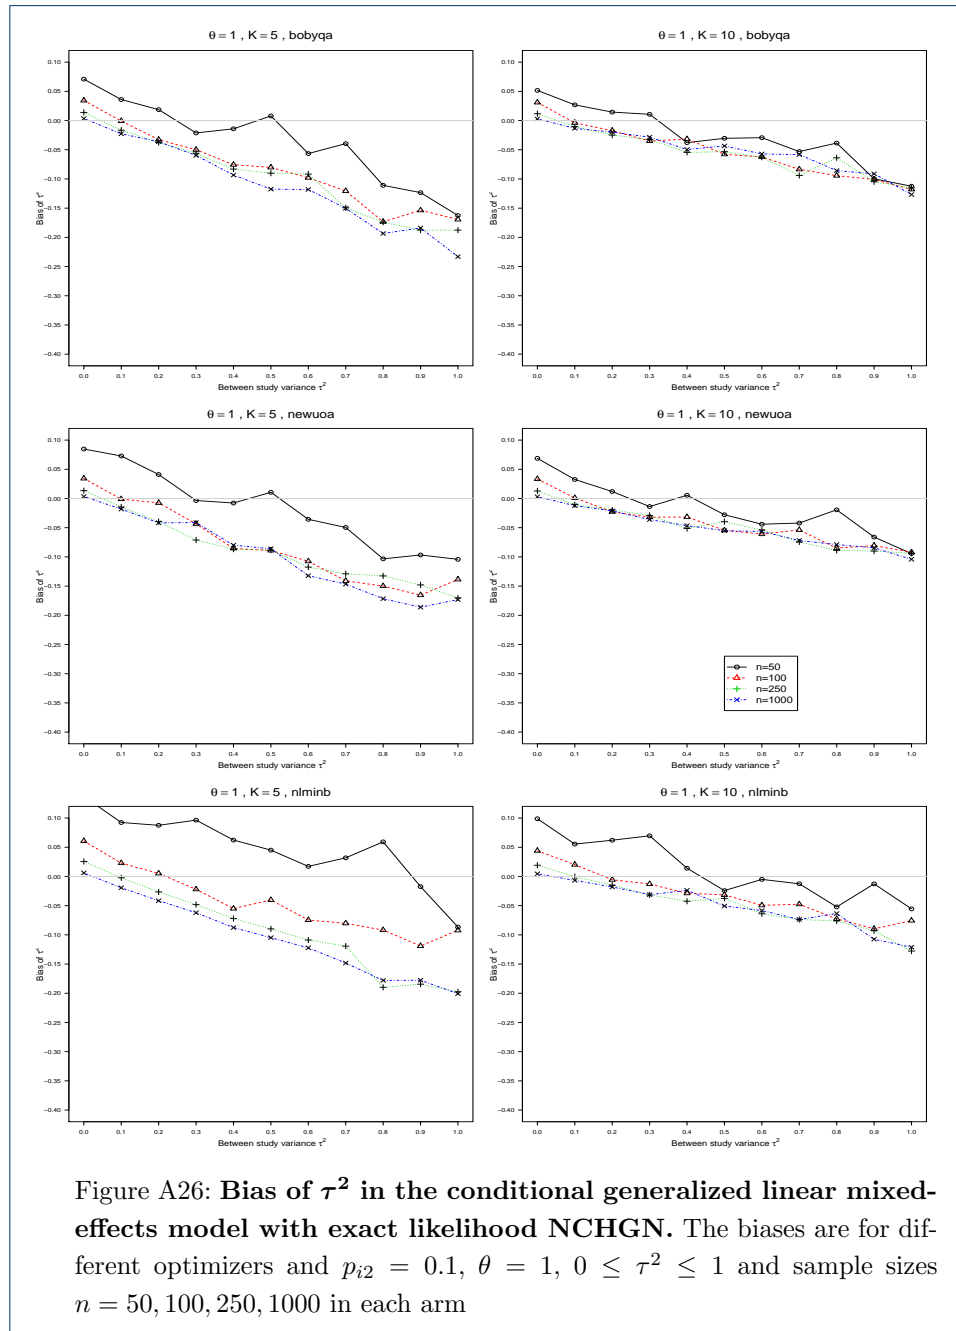

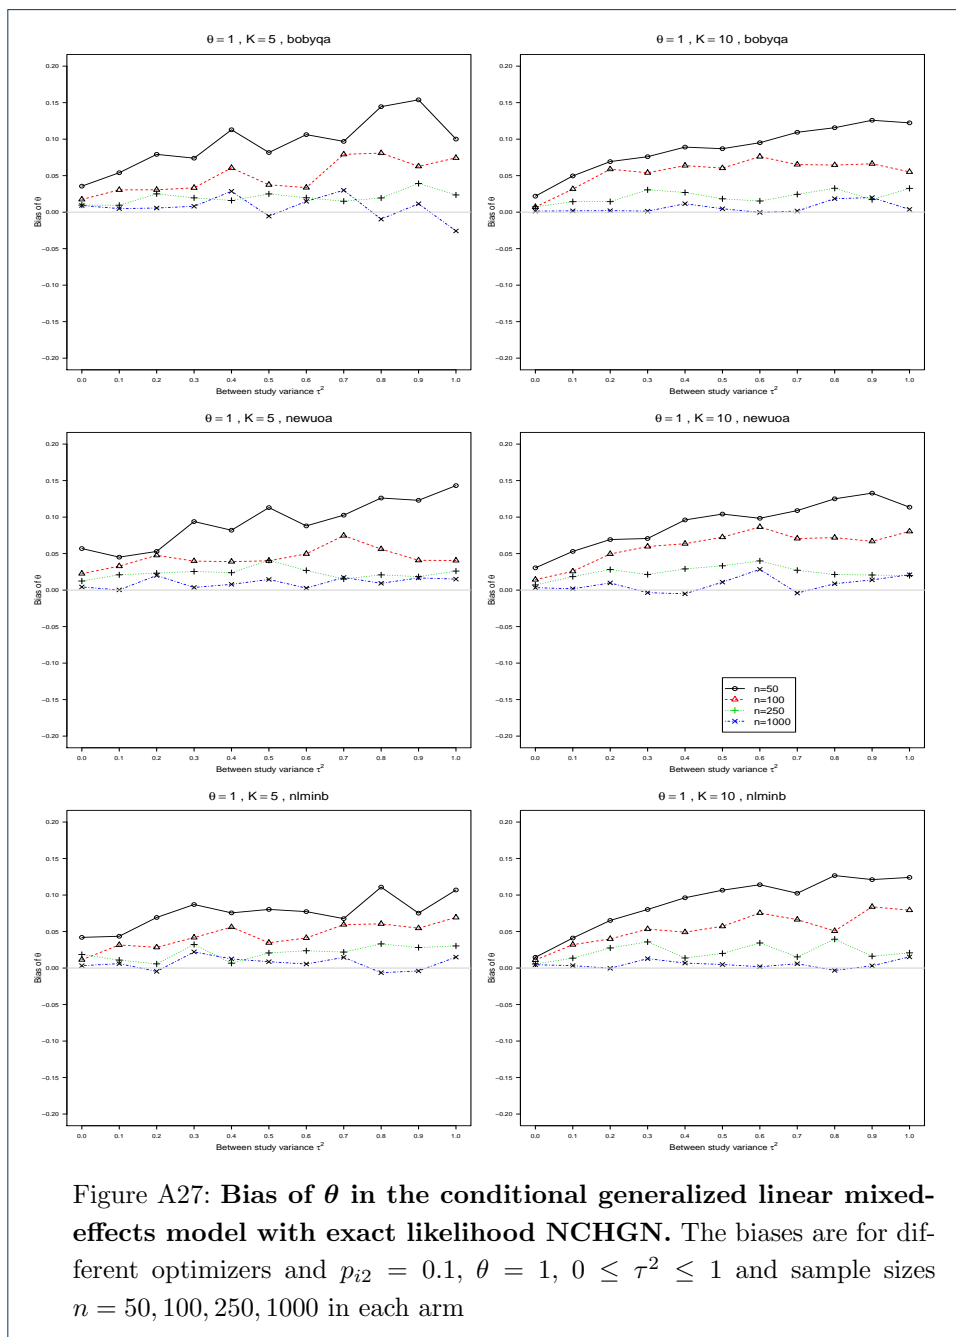

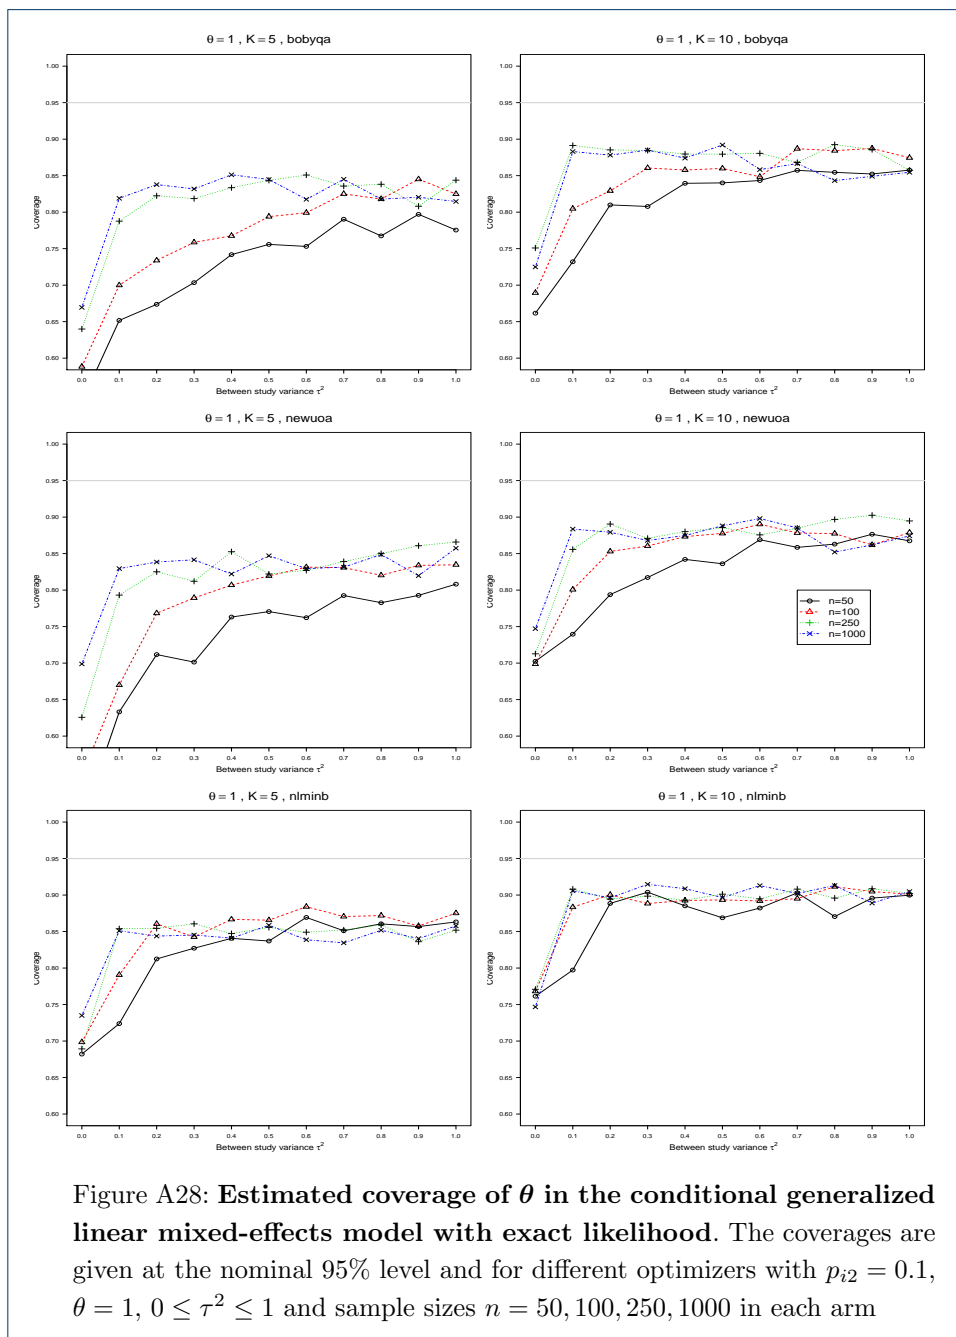

Figure A28: Estimated coverage of  $\theta$  in the conditional generalized linear mixed-effects model with exact likelihood. The coverages are given at the nominal 95% level and for different optimizers with  $p_{i2} = 0.1$ ,  $\theta = 1$ ,  $0 \leq \tau^2 \leq 1$  and sample sizes  $n = 50, 100, 250, 1000$  in each arm
