# Supplementary material for: Meta-analysis of binary outcomes via generalized linear mixed models: a simulation study
Source: PubMed Central journal article supplement (PMC6032567; doi:10.1186/s12874-018-0531-9), 2018-07-04
Supplement: 12874_2018_531_MOESM6_ESM.pdf [file 12874_2018_531_MOESM6_ESM.pdf]

## Additional file 6 - R code for GLMM analysis of simulated data in Section 3.2

```

# a conditional generalized linear mixed-effects model (exact likelihood)
#with default option for specification of non-central hypergeometric
#distribution-dFNCHypergeo from BiasUrn package
#and optimizer is set by default to "optim"
> ai<-c(726,741,892,630,745)
> bi<-c(274,259,108,370,255)
> ci<-c(401,406,378,415,404)
> di<-c(599,594,622,585,596)
> library(metafor)
Loading required package: Matrix
Loading 'metafor' package (version 1.9-9). For an overview
and introduction to the package please type: help(metafor).
> res1<-rma.glmm(measure="OR", ai=ai, bi=bi, ci=ci, di=di,
+model="CM.EL")
> res1

Random-Effects Model (k = 5; tau^2 estimator: ML)
Model Type: Conditional Model with Exact Likelihood

tau^2 (estimated amount of total heterogeneity): 1169.0647 (SE = 800.2414)
tau (square root of estimated tau^2 value):      34.1916
I^2 (total heterogeneity / total variability):   100.00%
H^2 (total variability / sampling variability):  118176.79

Tests for Heterogeneity:
Wld(df = 4) = 131.6573, p-val < .0001
LRT(df = 4) = 144.1083, p-val < .0001

Model Results:

estimate      se      zval      pval      ci.lb      ci.ub
35.6833    4.4481    8.0221    <.0001    26.9652    44.4014      ***
#####
# a conditional generalized linear mixed-effects model (exact likelihood)
#with default option for specification of non-central hypergeometric
#distribution-dnoncenhypergeom from from MCMCpack package
#and optimizer is set by default to "optim"
> res2<-rma.glmm(measure="OR", ai=ai, bi=bi, ci=ci, di=di,
+model="CM.EL", control=list(dnchgcac="dnoncenhypergeom"))
> res2

```

Random-Effects Model (k = 5; tau<sup>2</sup> estimator: ML)  
 Model Type: Conditional Model with Exact Likelihood

tau<sup>2</sup> (estimated amount of total heterogeneity): 1169.0647 (SE = 800.2357)  
 tau (square root of estimated tau<sup>2</sup> value): 34.1916  
 I<sup>2</sup> (total heterogeneity / total variability): 100.00%  
 H<sup>2</sup> (total variability / sampling variability): 118176.79

Tests for Heterogeneity:  
 Wld(df = 4) = 131.6600, p-val < .0001  
 LRT(df = 4) = 144.1083, p-val < .0001

Model Results:

| estimate | se     | zval   | pval   | ci.lb   | ci.ub   |     |
|----------|--------|--------|--------|---------|---------|-----|
| 35.6833  | 4.4480 | 8.0222 | <.0001 | 26.9653 | 44.4013 | *** |

```
# a conditional generalized linear mixed-effects model (exact likelihood)
#with default option for specification of non-central hypergeometric
#distribution-dFNCHypergeo from BiasUrn package
#and optimizer is set by default to "uobyqa"
> res3<-rma.glm(mmeasure="OR", ai=ai, bi=bi, ci=ci, di=di,
+model="CM.EL", control=list(optimizer="uobyqa"))
> res3
```

Random-Effects Model (k = 5; tau<sup>2</sup> estimator: ML)  
 Model Type: Conditional Model with Exact Likelihood

tau<sup>2</sup> (estimated amount of total heterogeneity): 0.3113 (SE = 0.2048)  
 tau (square root of estimated tau<sup>2</sup> value): 0.5580  
 I<sup>2</sup> (total heterogeneity / total variability): 96.92%  
 H<sup>2</sup> (total variability / sampling variability): 32.47

Tests for Heterogeneity:  
 Wld(df = 4) = 131.6627, p-val < .0001  
 LRT(df = 4) = 144.1083, p-val < .0001

Model Results:

| estimate | se     | zval   | pval   | ci.lb  | ci.ub  |     |
|----------|--------|--------|--------|--------|--------|-----|
| 1.5472   | 0.2536 | 6.1015 | <.0001 | 1.0502 | 2.0442 | *** |

```
# a conditional generalized linear mixed-effects model (exact likelihood)
#with default option for specification of non-central hypergeometric
#distribution-dFNCHypergeo from BiasUrn package
```

```

#and optimizer is set by default to "bobyqa"
> res4<-rma.glm(m=measure="OR", ai=ai, bi=bi, ci=ci, di=di,
+model="CM.EL", control=list(optimizer="bobyqa"))
> res4
Random-Effects Model (k = 5; tau^2 estimator: ML)
Model Type: Conditional Model with Exact Likelihood

tau^2 (estimated amount of total heterogeneity): 0.3113 (SE = 0.2049)
tau (square root of estimated tau^2 value):      0.5580
I^2 (total heterogeneity / total variability):   96.92%
H^2 (total variability / sampling variability):  32.47

Tests for Heterogeneity:
Wld(df = 4) = 131.6625, p-val < .0001
LRT(df = 4) = 144.1083, p-val < .0001

Model Results:

estimate      se      zval      pval      ci.lb      ci.ub
1.5472    0.2536    6.1015    <.0001    1.0502    2.0442    ***

# a conditional generalized linear mixed-effects model (exact likelihood)
#with default option for specification of non-central hypergeometric
#distribution-dFNCHypergeo from BiasUrn package
#and optimizer is set by default to "newuoa"
res5<-rma.glm(m=measure="OR", ai=ai, bi=bi, ci=ci, di=di,
+model="CM.EL", control=list(optimizer="newuoa"))
> res5

Random-Effects Model (k = 5; tau^2 estimator: ML)
Model Type: Conditional Model with Exact Likelihood

tau^2 (estimated amount of total heterogeneity): 0.3113 (SE = 0.2049)
tau (square root of estimated tau^2 value):      0.5580
I^2 (total heterogeneity / total variability):   96.92%
H^2 (total variability / sampling variability):  32.47

Tests for Heterogeneity:
Wld(df = 4) = 131.6643, p-val < .0001
LRT(df = 4) = 144.1083, p-val < .0001

Model Results:

estimate      se      zval      pval      ci.lb      ci.ub
1.5472    0.2536    6.1015    <.0001    1.0502    2.0442    ***

```

```
#####
#####
#####
#a conditional generalized linear mixed-effects model (approximate likelihood)
> res6<-rma.glmm(measure="OR", ai=ai, bi=bi, ci=ci, di=di, model="CM.AL")
> res6
```

Random-Effects Model (k = 5; tau<sup>2</sup> estimator: ML)  
Model Type: Conditional Model with Approximate Likelihood

```
tau^2 (estimated amount of total heterogeneity): 0.0160
tau (square root of estimated tau^2 value):      0.1264
I^2 (total heterogeneity / total variability):   61.76%
H^2 (total variability / sampling variability):  2.61
```

Tests for Heterogeneity:  
Wld(df = 4) = 25.6608, p-val < .0001  
LRT(df = 4) = 25.9627, p-val < .0001

Model Results:

| estimate | se     | zval   | pval   | ci.lb  | ci.ub  |     |
|----------|--------|--------|--------|--------|--------|-----|
| 0.6177   | 0.0630 | 9.8092 | <.0001 | 0.4943 | 0.7411 | *** |

```
#an unconditional generalized linear mixed-effects model
#with random study effects
> res7<-rma.glmm(measure="OR", ai=ai, bi=bi, ci=ci, di=di, model="UM.RS")
Warning message:
In rma.glmm(measure = "OR", ai = ai, bi = bi, ci = ci, di = di,
:
Currently not possible to fit RE/ME model='UM.RS' with nAGQ > 1. nAGQ automatically
> res7
```

Random-Effects Model (k = 5; tau<sup>2</sup> estimator: ML)  
Model Type: Unconditional Model with Random Study Effects

```
tau^2 (estimated amount of total heterogeneity): 0.3021
tau (square root of estimated tau^2 value):      0.5497
I^2 (total heterogeneity / total variability):   96.83%
H^2 (total variability / sampling variability):  31.54
```

```
sigma^2 (estimated amount of study level variability): 0.0499
sigma (square root of estimated sigma^2 value):      0.2234
```

Tests for Heterogeneity:

Wld(df = 4) = 171.3118, p-val < .0001  
 LRT(df = 4) = 158.5442, p-val < .0001

Model Results:

| estimate | se     | zval   | pval   | ci.lb  | ci.ub  |     |
|----------|--------|--------|--------|--------|--------|-----|
| 1.5446   | 0.2499 | 6.1806 | <.0001 | 1.0548 | 2.0344 | *** |

*#an unconditional generalized linear mixed-effects model  
 #with fixed study effects*

```
> res8<-rma.glmm(measure="OR", ai=ai, bi=bi, ci=ci, di=di, model="UM.FS")
> res8
```

Random-Effects Model (k = 5; tau<sup>2</sup> estimator: ML)

Model Type: Unconditional Model with Fixed Study Effects

tau<sup>2</sup> (estimated amount of total heterogeneity): 0.3106  
 tau (square root of estimated tau<sup>2</sup> value): 0.5573  
 I<sup>2</sup> (total heterogeneity / total variability): 96.91%  
 H<sup>2</sup> (total variability / sampling variability): 32.40

Tests for Heterogeneity:

Wld(df = 4) = 131.7382, p-val < .0001  
 LRT(df = 4) = 144.1967, p-val < .0001

Model Results:

| estimate | se     | zval   | pval   | ci.lb  | ci.ub  |     |
|----------|--------|--------|--------|--------|--------|-----|
| 1.5477   | 0.2533 | 6.1104 | <.0001 | 1.0513 | 2.0442 | *** |

#####  
 #####Standard REM with REML method#####  
 #####

```
> res9<-rma(measure="OR", ai=ai, bi=bi, ci=ci, di=di, method="REML")
> res9
```

Random-Effects Model (k = 5; tau<sup>2</sup> estimator: REML)

tau<sup>2</sup> (estimated amount of total heterogeneity): 0.3921 (SE = 0.2845)  
 tau (square root of estimated tau<sup>2</sup> value): 0.6262  
 I<sup>2</sup> (total heterogeneity / total variability): 97.54%  
 H<sup>2</sup> (total variability / sampling variability): 40.64

Test for Heterogeneity:

Q(df = 4) = 131.7382, p-val < .0001

Model Results:

| estimate | se     | zval   | pval   | ci.lb  | ci.ub  |     |
|----------|--------|--------|--------|--------|--------|-----|
| 1.5476   | 0.2837 | 5.4557 | <.0001 | 0.9916 | 2.1035 | *** |

```
#####
#####Standard REM with DL method#####
#####
> res10<-rma(measure="OR", ai=ai, bi=bi, ci=ci, di=di, method="DL")
> res10
```

Random-Effects Model (k = 5; tau<sup>2</sup> estimator: DL)

tau<sup>2</sup> (estimated amount of total heterogeneity): 0.3159 (SE = 0.2331)  
tau (square root of estimated tau<sup>2</sup> value): 0.5621  
I<sup>2</sup> (total heterogeneity / total variability): 96.96%  
H<sup>2</sup> (total variability / sampling variability): 32.93

Test for Heterogeneity:

**Q**(df = 4) = 131.7382, p-val < .0001

Model Results:

| estimate | se     | zval   | pval   | ci.lb  | ci.ub  |     |
|----------|--------|--------|--------|--------|--------|-----|
| 1.5469   | 0.2554 | 6.0570 | <.0001 | 1.0463 | 2.0474 | *** |

```
res11<-rma(measure="OR", ai=ai, bi=bi, ci=ci, di=di, method="FE")
```

Fixed-Effects Model (k = 5)

Test for Heterogeneity:

**Q**(df = 4) = 131.7382, p-val < .0001

Model Results:

| estimate | se     | zval    | pval   | ci.lb  | ci.ub  |     |
|----------|--------|---------|--------|--------|--------|-----|
| 1.4540   | 0.0443 | 32.8080 | <.0001 | 1.3671 | 1.5409 | *** |
